# Supplementary material for: Minimal phenotyping yields GWAS hits of reduced specificity for major depression
Source: bioRxiv or medRxiv preprint supplement (doi:10.1101/440735), 2019-11-04
Supplement: Supplementary file [file 440735-1.pdf]

## **Minimal phenotyping yields GWAS hits of low specificity for major depression**

Na Cai, Ph.D.<sup>1,2</sup>, Kenneth S. Kendler, M.D.<sup>3</sup>, Jonathan Flint, M.D.<sup>4</sup>

1. Wellcome Sanger Institute, Wellcome Genome Campus, Cambridgeshire, UK
2. European Bioinformatics Institute (EMBL-EBI), Wellcome Genome Campus, Cambridgeshire, UK
3. Virginia Institute for Psychiatric and Behavioral Genetics, Department of Psychiatry, Virginia Commonwealth University, Richmond, Virginia, USA
4. Center for Neurobehavioral Genetics, Semel Institute for Neuroscience and Human Behavior, University of California, Los Angeles, Los Angeles, California, USA

Corresponding author:

Na Cai, Ph.D.

Wellcome Sanger Institute

Wellcome Genome Campus

Hinxton CB10 1SA

Cambridgeshire, UK

Email: [nc10@sanger.ac.uk](mailto:nc10@sanger.ac.uk)

Telephone: +44 (0)7821 070220

## Supplemental Material

|                                                                                               |    |
|-----------------------------------------------------------------------------------------------|----|
| <b>Supplemental Methods</b>                                                                   | 4  |
| <b>Other studies referenced in this paper</b>                                                 | 4  |
| <b>Sample filtering</b>                                                                       | 4  |
| <b>DSM-based definition of MDD</b>                                                            | 5  |
| <b>Prevalence of definitions of MDD in UKBiobank</b>                                          | 6  |
| <b>Control of population structure in heritability estimates</b>                              | 6  |
| <b>Measure of lifetime trauma</b>                                                             | 8  |
| <b>Epidemiological analysis on risk factors for MDD</b>                                       | 9  |
| <b>Comparison of methods of heritability and genetic correlation estimation</b>               | 10 |
| <b>Stratification of definitions of MDD by environmental risk factors</b>                     | 12 |
| <b>Simulations of effects of misdiagnosis and misclassification on heritability estimates</b> | 12 |
| <b>Supplemental Figure Legends</b>                                                            | 16 |
| <b>Supplemental Figure S1: Overlap between definitions of MDD in UKBiobank</b>                | 16 |
| <b>Supplemental Figure S2: Effects of population structure and MHC/SVs</b>                    | 17 |
| <b>Supplemental Figure S3: LDSC estimates of heritability and genetic correlation</b>         | 18 |
| <b>Supplemental Figure S4: Simulations of misdiagnosis and misclassification</b>              | 19 |
| <b>Supplemental Figure S5: Simulations of misclassification at different heritabilities</b>   | 20 |
| <b>Supplemental Figure S6: GWAS on neuroticism and smoking in UKBiobank</b>                   | 21 |
| <b>Supplemental Figure S7: GWAS hits from 23andMe are not specific to MDD</b>                 | 22 |
| <b>Supplemental Table Legends</b>                                                             | 23 |
| <b>Supplemental Table S1: Other studies referenced in this paper</b>                          | 23 |
| <b>Supplemental Table S2: DSM-based criteria for lifetime and current MDD</b>                 | 25 |
| <b>Supplemental Table S3: Number of samples by assessment centre</b>                          | 26 |
| <b>Supplemental Table S4: Prevalence of each definition of MDD</b>                            | 29 |
| <b>Supplemental Table S5: Correction for population in assessment centres</b>                 | 30 |
| <b>Supplemental Table S6: Correction for age and sex</b>                                      | 31 |

|                                                                                                                                                                         |    |
|-------------------------------------------------------------------------------------------------------------------------------------------------------------------------|----|
| <b>Supplemental Table S7: Derivation of lifetime trauma score</b>                                                                                                       | 32 |
| <b>Supplemental Table S8: Heritability estimates of definitions of MDD from different methods</b>                                                                       | 34 |
| <b>Supplemental Table S9: Heritability of definitions of MDD stratified by risk factors</b>                                                                             | 35 |
| <b>Supplemental Table S10: Genome-wide significant loci in GWAS for smoking</b>                                                                                         | 39 |
| <b>Supplemental Table S11: Genome-wide significant loci in GWAS for neuroticism</b>                                                                                     | 41 |
| <b>Supplemental Table S12: Genetic correlation between definitions of MDD and other conditions</b>                                                                      | 44 |
| <b>Supplemental Table S13: Genome-wide significant loci in GWAS for definitions of MDD</b>                                                                              | 47 |
| <b>Supplemental Table S14: Effects of GWAS loci from help-seeking definitions on other definitions of MDD in UKBiobank and psychiatric conditions</b>                   | 49 |
| <b>Supplemental Table S15: Effects of GWAS loci from minimal phenotyping definition of MDD in 23andMe on definitions of MDD in UKBiobank and psychiatric conditions</b> | 55 |
| <b>Supplemental References</b>                                                                                                                                          | 59 |

## Supplemental Methods

### Other studies referenced in this paper

We have summarised the other studies we reference in our paper, summary statistics of many of which are available on the Psychiatric Genomics Consortium website, in Supplemental Table S1. For each of the studies, we use only those SNPs with imputation INFO score above 0.9 and MAF > 5% in estimation of heritability, partitioned heritability, and genetic correlation.

### Sample filtering

Of all 502,637 samples in UKBiobank full release, we performed the following QC steps to select the samples for use in our analyses. We first removed samples that were not included in the UKBiobank full release PCA analysis, which includes samples that were indicated as “het.missing.outliers” (“Indicates samples identified as outliers in heterozygosity and missing rates, which indicates poor-quality genotypes for these samples”), “excess.relatives” (“Indicates samples which have more than 10 putative third-degree relatives in the kinship table”), and whose “Submitted.Gender” were different from “Inferred.Gender”, bringing the sample size down to 407,219. We checked that this remaining sample contains only one out of any pair or group of related individuals with relatedness > 0.05.

We then selected samples indicated to be “in.white.British.ancestry.subset” (“Indicates samples who self-reported 'White British' and have very similar genetic ancestry based on a principal components analysis of the genotypes”), bringing the sample size down further to 337,545. We then removed 337 samples indicated as having “putative.sex.chromosome.aneuploidy” (“Indicates samples identified as putatively carrying sex chromosome configurations that are not either XX or XY”). Finally, we removed 7 samples who have withdrawn their consent for use of their genetic data in analyses, arriving at our final set of 337,198 samples passing QC<sup>1</sup>.

Of these samples, 37,041 were part of UK Biobank Lung Exome Variant Evaluation (UKBiLEVE), a study for chronic obstructive pulmonary disease (COPD). We retain all samples in UKBiLEVE, but as they are genotyped using a custom array optimized for coverage over regions implicated in lung health and disease<sup>2</sup>, we consistently use genotyping array as a covariate in all our analyses.

For our analyses on different definitions of depression in UKBiobank, we further excluded 2,499 samples that indicated as having a history of substance abuse (“alcohol dependency”: 1408, “opiod dependency”: 1409 or “other substance abuse/dependency”: 1410), manic or psychotic conditions (in the “Non-cancer illness code,

self-reported” (data field 20002) section of the verbal interview, or who are classified under “Bipolar I Disorder” or “Bipolar II Disorder” in the “Bipolar and major depression status” (data field 20126) derived data field, giving a total of 334,699 samples for our study on definitions of MDD in UKBiobank.

### **DSM-based definition of MDD**

We derive a DSM-V<sup>3</sup> based *in silico* diagnosis of lifetime MDD using diagnostic questions on the online mental health follow-up (data category 138).

To qualify as a case of lifetime MDD according to DSM-V criteria, we first require individuals participating in UKBiobank to answer “Yes” to either the questions "Have you ever had a time in your life when you felt sad, blue, or depressed for two weeks or more in a row?" (data field 20446, DSM criterion A1 in Supplemental Table S2) or "Have you ever had a time in your life lasting two weeks or more when you lost interest in most things like hobbies, work, or activities that usually give you pleasure?" (data field 20441, DSM criterion A2 in Supplemental Table S2). Both are cardinal symptoms for DSM-V defined MDD.

We then require them to have 3 or 4 among the criteria A3-A9 shown in Supplemental Table S2. We note that this questionnaire does not contain the DSM criterion A5, which requires “Psychomotor agitation or retardation nearly every day (observable by others, not merely subjective feelings of restlessness or being slowed down)”, and hence assays only 8 out of the 9 symptoms for DSM-V MDD. Nonetheless, we require individuals to have a total of at least 5 symptoms, including at least one out of the two cardinal symptoms (A1 and A2) such that they have at least 5 out of 9 symptoms for DSM-V defined MDD, to fulfil the DSM-V A criterion: *Five (or more) of the following symptoms have been present during the same 2-week period and represent a change from previous functioning; at least one of the symptoms is either (1) depressed mood or (2) loss of interest or pleasure.*

Finally, we require those who fulfil the symptoms criteria to answer “Yes” to the question "Think about your roles at the time of this episode, including study / employment, childcare and housework, leisure pursuits. How much did these problems interfere with your life or activities?" (data field 20440), to fulfil the DSM-V B criterion: *The symptoms cause clinically significant distress or impairment in social, occupational, or other important areas of functioning.*

As we exclude individuals who report a history of substance abuse, as well as manic or psychotic conditions (Methods), we further fulfil criteria C, D and E of DSM-V for MDD:

*C. The (MDD) episode is not attributable to the physiological effects of a substance or to another medical condition.*

*D. The occurrence of the major depressive episode is not better explained by schizoaffective disorder, schizophrenia, schizophreniform disorder, delusional disorder, or other specified and unspecified schizophrenia spectrum and other psychotic disorders.*

*E. There has never been a manic episode or a hypomanic episode” respectively.*

Among the diagnostic questions on the online mental health follow-up (data category 138), there are also questions on whether one had recent (2 weeks leading up to the assessment) symptoms of MDD. Using the questions on current MDD shown in Supplemental Table S2 and the same principles as stated above, for lifetime MDD, we derived a current MDD phenotype, which we combine with the lifetime MDD phenotype to arrive at the LifetimeMDD phenotype, representing DSM-based definition of MDD in our analysis. Further, using the question on lifetime number of depressed episodes in the online mental health follow-up (data field 20442), we designated those cases of LifetimeMDD who indicated they had two or more episodes as cases for recurrent DSM-based MDD (MDDRecur). We show the overlaps between definitions of MDD in UKBiobank in Supplemental Figure S1.

### **Prevalence of definitions of MDD in UKBiobank**

In our analyses of definitions of depression in UKBiobank, we make an important assumption that the prevalence of each definition of depression in the population UKBiobank is sampling from is exactly represented by the prevalence in the dataset. This cannot be true, as not all participants in UKBiobank were asked questions from all categories. Questions for the Symptom-based definition DepAll were asked in only 10 out of 22 assessment centers in UKBiobank (Supplemental Table S3). In addition, there may be self-report biases and uneven sampling of different demographics.

Using the 2011 UK census data<sup>4</sup>, we find that discrepancy between sample and population prevalence for all definitions of depression we examine in UKBiobank are small when corrected for regional populations, age and sex (Supplemental Tables S4-6). As such, in all of our analyses, we use the observed sample prevalence for each definition of depression in UKBiobank as the population prevalence.

### **Control of population structure in heritability estimates**

Questions forming the criteria for different definitions of MDD are not all answered by the same individuals in UKBiobank, potentially leading to different levels of cryptic relatedness and population structure among individuals making up cases and controls in different definitions of MDD. For example, questions on cardinal symptoms of MDD in the touchscreen questionnaire, necessary for meeting the criteria for being a case in DepAll, is answered by only those who went to 10 out of 22 assessment centres (Supplemental Table S3).

To ensure we control for population structure adequately for all definitions of MDD in UKBiobank regardless of which assessment centres the individuals making up cases and controls are from, we assessed the per-chromosome heritabilities of all definitions of MDD estimated jointly and separately with BOLT-REML, using a total of 334,681 genotyped SNPs with MAF > 5% and HWE P value > 10e-6 across all chromosomes as model SNPs. Difference between the slopes between per chromosome heritability and length of chromosome (approximated with number of SNPs used as model SNPs in each chromosome) in the two models (joint and separate) is telling of population structure that induce long-range LD between chromosomes, as heritability attributable to SNPs on one chromosome can be “leaked” into the estimates of a different chromosome due to long-range LD in presence of population structure, when heritabilities are estimated separately. We find that difference between the two slopes are minimal when using either PCs calculated using all White-British samples in UKBiobank, which we used as covariates in heritability estimates and GWAS on the definitions of MDD in UKBiobank (Methods). We show the results in Supplemental Figure S2a; we therefore use all-samples PCs in all the heritability estimates and GWAS we report, except for stratified analyses where numbers of samples in each stratum are substantially smaller than the whole UKBiobank White-British cohort where we used definition and stratum specific PCs.

As recommended by the UKBiobank<sup>1</sup>, we removed the major histocompatibility complex (MHC) region as well as known structural variants (SVs)<sup>5</sup> before selecting SNPs for the computation of PCs (Methods) which we use for all association and heritability analyses. As a result, there is little control over population structure over these regions in both association testing and heritability estimation. This may lead to false positive associations as well as inflated heritability estimates.

We therefore indicated whether each significant association is in MHC and SV regions in Supplemental Table S6, and use hollow points to represent SNPs in manhattan plots (Supplemental Figure S6) - the validity of these associations can be followed up with sequencing of regions involved, and does not fall in the scope of this paper. To check if lack of population structure control over SVs and MHC regions affect heritability estimates, we estimate heritability using LDSC using all SNPs (LDSC-AllSNPs), excluding SNPs in the MHC region on chromosome 6:25-35MB (LDSC-noMHC), and excluding SNPs in the both MHC region and SVs<sup>5</sup> (LDSC-noMHCSVs). In Supplemental Figure S2b we show that while heritability decreases from LDSC-AllSNPs estimates when we remove MHC or/and SVs, the decreases are not significant in any of the definitions of MDD

in UKBiobank, and the trend between definitions of MDD remain the same. As such, we conclude that excluding MHC and SVs in the calculation of PCs is unlikely to cause significant biases in estimation of heritabilities of particular or all of the definitions of MDD.

### **Measure of lifetime trauma**

A binary measure of lifetime trauma was derived from self-reported experience of traumatic events from the online mental health follow up questionnaire (data category 145), in order to identify individuals exposed to severe environmental adversities. The online mental health questionnaire for traumatic events consist of 16 questions on childhood, adulthood and lifetime trauma. We have scored individuals as having experienced each traumatic event as “1” and those who have not experienced each traumatic event as “0”, as shown in Supplemental Table S7. Of the 16 questions, we have included 12 for derivation of an aggregate “lifetime trauma” measure, the remaining 4 capture the same traumatic events the other questions we have included do, and are hence redundant.

We then asked how much each traumatic experience contribute to risk of developing LifetimeMDD, the DSM-based definition of MDD in UKBiobank, by jointly modelling their contribution along with age, sex, social deprivation (in townsend deprivation index), years of education, experience of any traumatic life event in the past 2 years (data field 6145), neuroticism, and total number of traumatic experiences one had in logistic regression. The odds ratios (ORs) of each traumatic experience on LifetimeMDD is shown in Supplemental Table S7. Since traumatic events vary in severity, a lifetime trauma score was constructed by weighting each item by their effect size on LifetimeMDD, and summing across all 12 items. As not all questions on traumatic experience are answered by all individuals who took part in the online mental health follow-up, we removed individuals who did not answer more than 3 questions on traumatic experience. We obtained lifetime trauma score for 109,699 individuals, with mean score 1.90 (standard deviation = 2.11). We categorize 33,619 individuals with scores above 2.5 as having experienced significant lifetime trauma (who report a mean of 3.17 traumatic experiences) and those with scores below 2.5 as not having experienced significant lifetime trauma (who report a mean of 0.66 traumatic experiences).

We note the following caveats in our use of self-reported answers to questionnaires to infer level of lifetime trauma. First, in weighting traumatic events based on their effects on LifetimeMDD in creating the measure of lifetime trauma, one can potentially incur biases in genetic associations to LifetimeMDD at genetics variants that contribute to both lifetime trauma and LifetimeMDD when one stratifies individuals in LifetimeMDD by lifetime trauma. However, this bias will likely be small, as the weighted lifetime trauma score is highly correlated with number of traumatic experiences individuals self-report ( $r^2=0.92$ ,  $p < 10^{-16}$ ), and this self-report is assumed



to be independent of LifetimeMDD (see second caveat). Moreover, even if present, this bias will not extend to other definitions of MDD in UKBiobank acquired through independent questionnaires.

Second, as both questionnaires on traumatic events and DSM-based MDD symptoms (used for specifying LifetimeMDD) are on the same online mental health follow up assessment, how one answers one questionnaire may affect how one answers the other, potentially incurring errors in retrospective recall. This is an unavoidable problem in UKBiobank given the structure of the questionnaire, and as such here we assume that the errors incurred are negligible. In addition, as the online mental health follow-up is conducted a year or two after one takes part in the initial assessment through the touchscreen questionnaire, there should be little to no effects of retrospective recall errors on all other definitions of MDD in UKBiobank which we derive from answers to questions in the touchscreen questionnaire.

### **Epidemiological analysis on risk factors for MDD**

We assess the effects of known risk factors for MDD on the different definitions of MDD in UKBiobank; for each binary or quantitative risk factor, we asked for its odds ratio (OR) for each definition of MDD using logistic regression correcting for UKBiobank collection centers (data field 54, as factors), as well as years of education (data field 845, quantitative), age (data field 21022, quantitative) and sex (data field 31, binary) unless one of three factors is being tested. The binary risk factors we tested are:

1. Age: data field 21022; dividing individuals into those < 60 years old and those  $\geq 60$
2. Sex: data field 31; dividing individuals into males and females
3. lifetime trauma: data category 145 for “Traumatic events reported within the on-line mental health questionnaire”; we calculated a weighted measure of traumatic events, dividing individuals into those who have weighted measure = 1 and those with weighted measure = 0.

The quantitative risk factors we tested are:

1. neuroticism: data field 20127 for “12 neurotic behaviour domains as reported from fields 1920, 1930, 1940, 1950, 1960, 1970, 1980, 1990, 2000, 2010, 2020 and 2030 from the touchscreen questionnaire at baseline”
2. social deprivation: data field 189 for townsend deprivation index (TDI) calculated for per individual just before baseline assessment)
3. years of education: data field 845; for age one stopped continuous full-time education, from which we infer years of continuous education received by each individual assuming starting age of 6.

For quantitative risk factors we report ORs for per SD increase in the measure. The UK Biobank cohort contains more women than men (the female to male ratio is 1.16 to 1), with more younger women than men (there are 6% more women than men younger than 60, compare to 2% older than 60) and is more educated among the young than the old (those with more than 10 years of education form 42.5% of those younger than 60, compare to 28.4% among those older than 60). Thus, in each analysis we included age, sex and number of years of education as covariates unless they are the risk factors tested (together with collection center).

### **Comparison of methods of heritability and genetic correlation estimation**

Many methods have been developed to estimate narrow sense heritability from either whole-genome SNP data<sup>6-9</sup> or summary statistics of association tests<sup>10-12</sup> across the whole genome, and the sensitivity of heritability estimates to assumptions in different models employed by the different methods have been discussed and reviewed extensively in the past few years<sup>13,14</sup>.

For all the heritability estimates in our analysis we use the phenotype-correlation-genotype-correlation (PCGC) approach, an adaptation of Haseman-Elston regression specifically suited for analysing case-control data in the presence of covariates of large effects, such as sex and age, and has been shown to produce unbiased estimates of heritability and genetic correlation for case-control phenotypes<sup>6,12</sup>. We use the PCGCs<sup>6,12</sup> framework, generating summary statistics for definitions of MDD in UKBiobank in our study which can be reused for estimation of genetic correlation with other phenotypes from other cohorts processed the same way.

We note, however, that previously published estimates of heritability of MDD<sup>15-19</sup>, are mostly generated using LDSC<sup>10</sup> if they were estimated from GWAS summary statistics, or either GCTA<sup>9</sup>, LDAK<sup>8</sup>, or BOLT-REML<sup>7</sup> if they were estimated from individual level genotypes. All of them estimate heritability of case-control traits on the “observed scale” under a quantitative trait framework, and apply a correction factor to results to convert them to a “liability scale” to account for the ascertainment of cases in case-control studies. The same applies when estimating genetic correlation.

In Supplemental Table S8, we show the heritability estimates of each definition of MDD in UKBiobank using PCGCs, LDSC, and BOLT-REML. For both PCGCs and LDSC, we use 8,968,716 imputed SNPs with MAF > 5% in our analysis (Methods), while for BOLT-REML we use 334,681 genotyped SNPs with MAF > 5% and HWE P value > 10e-6 as model SNPs using which it estimates heritability. For both results from LDSC and BOLT-REML, we use LD scores calculated on all imputed SNPs in UKBiobank using LDSC as reference, and convert the heritability estimates on the observed scale to liability scale specifying the prevalence of each definition of MDD in UKBiobank as shown in Supplemental Table S8.

For PCGCs, we show in addition to heritability the genetic variance and its standard error, which is variance attributable to genetics over total phenotypic variance (referred to as “marginal heritability” in Weisbrod et al 2018<sup>12</sup>), the comparable measure to heritability from the other two methods. Heritability ( $h^2$ , referred to as “conditional heritability”) in PCGCs is genetic variance divided by the total liability variance, which also includes variance introduced by fixed effects (in this case, genotype PCs and genotyping array). The similarity between heritability and genetic variance estimates from PCGCs shows that the fixed effect covariates do not contribute much to variance in any of the definitions of MDD.

Results from the three methods show the same trend - the DSM-based definitions LifetimeMDD and MDDRecur show the highest heritability estimates while the help-seeking based definitions GPpsy and Psypsy, as well as their no-MDD components GPNoDep and PsyNoDep, show the lowest heritability estimates. To put the heritability estimates of definition of MDD used in our study in context with previous published estimates from LDSC, we show in Supplemental Figure S3a that the DSM-based definitions LifetimeMDD and MDDRecur have heritabilities closer to LDSC heritability estimates of MDD in CONVERGE<sup>15</sup> and PGC1-MDD<sup>18</sup>, while help-seeking based definitions GPpsy and Psypsy have estimates closer to that in similarly defined, minimal phenotyping based MDD in 23andMe<sup>17</sup>.

The difference between the methods show the same expected trend discussed in the literature on heritability estimation. While LDSC and BOLT-REML estimates are highly similar to each other, PCGCs estimates are higher than both of them, consistent with expectations of downward bias in heritability estimation of case-control traits using LDSC and REML due to a variety of factors including handling of covariates and use of external MAF references in PCGCs.

Finally, we compare the estimation of genetic correlation between definitions of MDD using PCGCs and LDSC. In Supplemental Figure S3b we show the genetic correlation between LifetimeMDD, the DSM-based definition, with all other definitions of MDD in UKBiobank estimated using LDSC (Figure 3b shows the PCGCs estimates). The trend LDSC estimates show is similar to that from PCGCs, though both point estimates are higher across the board and standard errors are larger than that from PCGCs, making most estimates not significantly different from 1. This is consistent with the expectation that LDSC may over-estimate genetic correlations due to mishandling of covariates and overlap of samples<sup>12</sup>.

Overestimates of genetic correlation between definitions of MDD (not significantly different from 1) may send the misleading message that the genetic architectures in different definitions of MDD, even those on opposite ends of the spectrum in terms of case criteria, are not significantly different from each other. This obscures important genetic differences between different definitions of MDD.

## **Stratification of definitions of MDD by environmental risk factors**

We stratified samples from definitions of MDD in UKBiobank by environmental risk factors which we assessed the effects for, in the following ways. We estimate heritability in each strata of samples using PCGCs (Methods), and all results are shown in Supplemental Table S9.

1. by age: data field 21022; dividing individuals into those < 60 years old and those  $\geq 60$
2. by sex: data field 31; dividing individuals into males and females
3. by lifetime trauma: data category 145 for “Traumatic events reported within the on-line mental health questionnaire”; we calculated a weighted measure of traumatic events, dividing individuals into those who have weighted measure  $\geq 2.5$  and those with weighted measure < 2.5
4. by neuroticism: data field 20127 for neuroticism score; dividing individuals into those who score  $\geq 5$  and those who score < 5
5. by social deprivation: data field 189 for Townsend deprivation index (TDI); dividing individuals into those with TDI < 0 and those with TDI  $\geq 0$
6. by years of education: data field 845; dividing individuals into those with years of education  $\geq 11$  and < 11).

Using the heritability estimates and standard errors from PCGCs, we performed t-tests on the heritabilities from the strata in each stratification, and ask whether they are significantly different from 0 at  $p < 0.05$ , using a two-tailed test and correcting for 49 stratifications. None of the difference between strata, from any definition of MDD and stratification, is significant, though the method is underpowered as compared to other methods that requires the use of individual level genotypes<sup>20</sup>.

## **Simulations of effects of misdiagnosis and misclassification on heritability estimates**

If we assume DSM-based definitions of MDD in UKBiobank (LifetimeMDD), with its set of genetic factors contributing a particular fraction of liability to the disease (heritability), as the gold standard, the question is whether the other definitions of MDD (from minimal phenotyping) share the same genetic factors and their total contribution to the liability to the disease. If yes, do they simply contain milder forms of the disease (those with lower liability) that do not qualify for DSM-based definition of MDD, or do they contain misdiagnosis of those without the disease as cases? If no, are they cases of a genetically correlated disease that may be misclassified as MDD?

We perform simulations to show the effects of misdiagnosis and misclassification on heritability estimates, and

in turn, whether they may be the cause of lower heritability estimates in the minimal phenotyping definitions of MDD. We adopt the theoretical framework of the liability threshold model, where every individual has a normally distributed liability value for a trait such that case subjects of the trait are individuals whose liability exceeds a given cutoff<sup>21</sup>. The cutoff for the liability was determined as the 1- $K_i$  percentile of the simulated liabilities, where  $K_i$  is what we set as the prevalence of cases. To simulate a biobank sample (which is assumed to be representative of the population), we do not ascertain for cases.

Using array genotypes at 344,184 SNPs ( $LD < 0.5$ ,  $MAF > 5\%$ ,  $HWE P \text{ value} > 10e-6$ ) in 25,000 random individuals from UKBiobank who are White-British (Methods), we used LDAK<sup>8,22</sup> to simulate pairs of traits  $y_{i,1}$  and  $y_{i,2}$  with genetic correlation  $rG_i$ , where for each  $i$  in  $i \in \{1..10\}$ : 5000 causal SNPs are picked uniformly at random to contribute a total heritability for  $y_{i,1}$  and  $y_{i,2}$  of  $h_{i,1}^2 = h_{i,2}^2 = h_i^2$  using the model  $Y = \sum \beta_j X_j + e$ , where  $\beta_j$  is the effect size of  $X_j$ , the  $j$ th causal SNP, and  $e$  is Gaussian-distributed noise. Effect size at each SNP  $X_j$  is sampled under the Model  $\beta_j \sim N(0, [f_j(1 - f_j)] - 1)$ , where  $f_j$  is the MAF of  $X_j$ . The LDAK command we use is as follows:

```
ldak5.linux --make-phenos traitpair$i.h2$h2i.rg$rGi --bfile $bfile --ignore-weights YES --power -1 --num-causals 5000 --num-phenos 2 --her $h2i --bivar $rGi
```

*Where  $i \in \{1..10\}$ ,  $h_i^2 \in \{0.2, 0.4, 0.6, 0.8\}$ ,  $rG_i \in \{0, 0.2, 0.4, 0.6, 0.8, 0.95\}$*

In the first set of simulations, we show that including individuals with lower liabilities to a disease (trait) as cases (increasing prevalence of cases  $K_i$  through lowering the liability cutoff) would not have an effect on liability scale heritability estimates of the trait. We estimate the liability scale heritability of each trait using the `--pcgc` option in LDAK appropriate for binary traits, accounting for the prevalence of cases  $K_i$  used. As we both do not ascertain for cases, and do not simulate covariates with effects on the traits, heritability estimates from the simulations do not suffer from downward estimates in REML presented previously for case-control traits<sup>12</sup> when converted to the liability scale<sup>6,21</sup>. As such, using both `--reml` with `--prevalence` and `--pcgc` options give the same liability scale heritability estimates on the simulated traits. Supplemental Figure S5a shows the heritability estimates of traits with heritabilities  $h_i^2 \in \{0.2, 0.4, 0.6, 0.8\}$  for  $i \in \{1..10\}$ , where we shift the prevalence  $K_i$  from 0.1 to 0.5, and recover the simulated heritabilities exactly regardless of  $K_i$ . While this is well-known, it refutes the misconception that minimal phenotyping definitions of MDD have lower heritabilities than DSM-based definitions because they contain individuals with lower liabilities to MDD.

In the second set of simulations, we show that misdiagnosis of controls as cases lowers heritability. At a constant liability threshold corresponding to  $K_i = 0.2$ , if we identify all individuals above liability threshold correctly as cases, but identify random controls as cases such that the percentage of misdiagnosis cases ranges from 0% to

50% of all cases (thereby increasing apparent case prevalence), then liability scale heritability (corrected for the apparent prevalence) decrease as a result (Supplemental Figure S4b). This decrease is consistent with the high prevalence and low heritability we observe in minimal phenotyping based MDD in UKBiobank and 23andMe<sup>17</sup> (Figure 3a, Supplemental Figure S3a). We note that our simulations do not misidentify true cases as controls (in other words, we have a sensitivity of 100% for true cases, while having a false discovery rate of cases ranging from 0% to 50%); in realistic settings, it is possible sensitivity to true cases will decrease as collection criteria becomes less stringent. If we lowered the sensitivity, the heritability estimates are likely decrease further.

However, the above scenario must not be the only explanation for the lower heritability in minimal phenotyping based MDD. As genetic correlation between definitions of MDD should not differ if all genetic factors are shared and effects were only lower in some definitions due to noise (Figure 3b). Hence, we hypothesize minimal phenotyping definitions of MDD may in fact contain cases of other conditions that are misclassified as MDD, and simulate misclassification of cases from a genetically correlated disease to find out if it may result in a decrease in heritability consistent with the lowered heritability estimate in minimal phenotyping definitions of MDD.

We first correctly identify all individuals above liability threshold for prevalence  $K_{i,1} = 0.2$  in  $y_{i,1}$  ( $h_{i,1}^2 = 0.4$ ) as cases of  $y_{i,1}$ . Then, we misclassify 10% to 50% of cases of genetically correlated  $y_{i,2}$  ( $h_{i,2}^2 = 0.4$ , prevalence  $K_{i,2} = 0.2$ ) as cases of  $y_{i,1}$ , hence increasing apparent case prevalence of  $y_{i,1}$ . The two traits have genetic correlation  $rG_i \in \{0, 0.2, 0.4, 0.6, 0.8, 0.95\}$ . As shown in Supplemental Figure S4c, we find that increasing the percentage of misidentification decreases liability scale heritability of  $y_{i,1}$  (corrected for the apparent prevalence) if  $rG_i$  is small, but can inflate liability scale heritability if  $rG_i$  is large ( $\geq 0.6$ ). This inflation decreases with increase in heritabilities of both traits (Supplemental Figure S5). This analysis shows that as long as two traits are completely heritable, and there are environmental contributions, misclassifying cases of one as the cases of the other would lead to erroneous estimates of heritability, even at very high genetic correlations.

As genetic correlation between definitions of MDD and other psychiatric conditions are low (maximum genetic correlation with neuroticism at a mean of 0.67 among all definitions of MDD, Supplemental Table S12, Figure 4), and genetic correlation between DSM-definition of MDD (LifetimeMDD) and those without MDD (GPNNoDep, making up 30% cases in minimal phenotyping definition of MDD GPsy) is 0.58 (se=0.078), most of the potential misclassification could have come from conditions with genetic correlation with MDD lower than 0.6 and led to downward bias of heritability observed in minimal definitions of MDD in UKBiobank.

In summary, our simulations are consistent with a model where the lower heritability in minimal phenotyping based MDD is not due to lowering liability threshold for case definition in MDD, but a consequence of

potentially both misdiagnosis of those who do not have MDD as cases, and misclassification of those with other conditions as cases (and the misidentification of true cases as controls, not simulated).

## Supplemental Figures

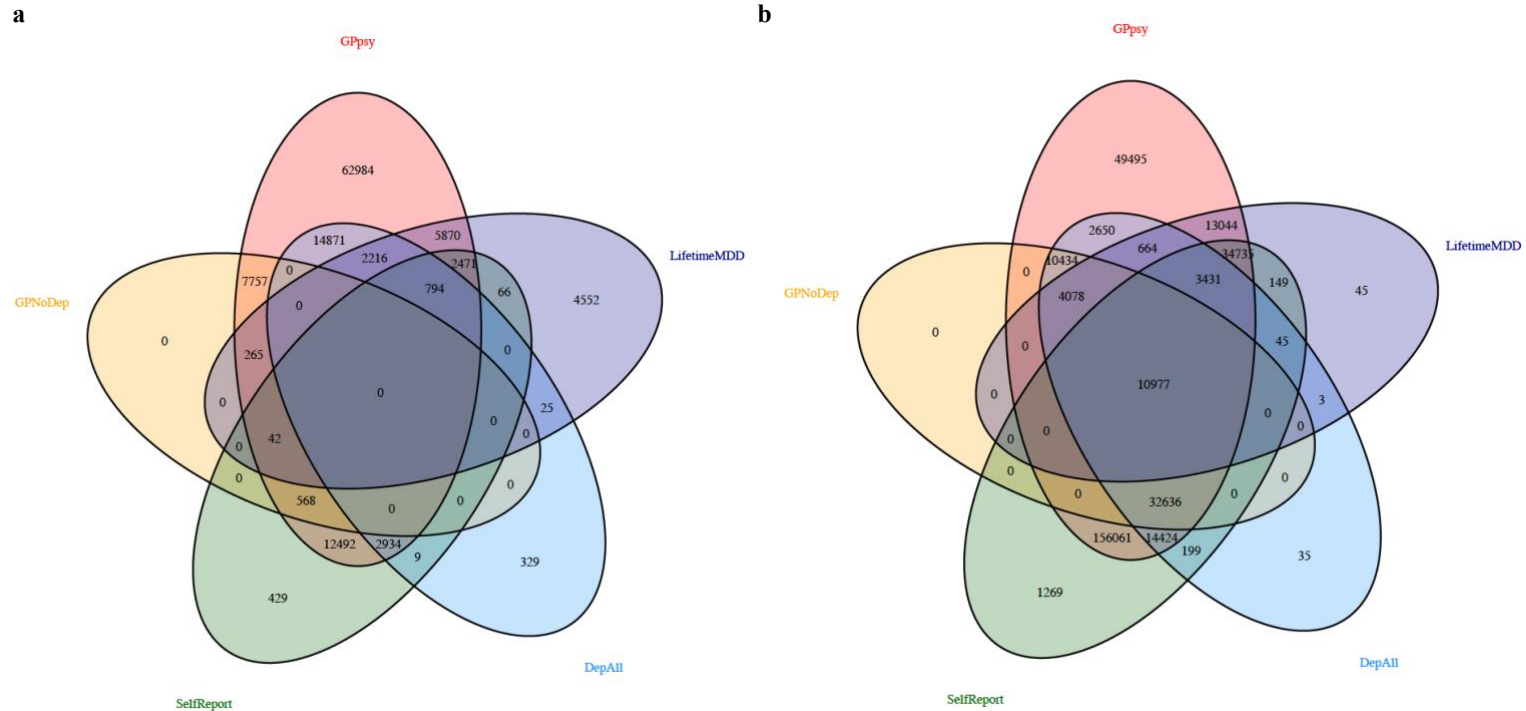

### Supplemental Figure S1: Overlap between definitions of MDD in UKBiobank

a) This figure shows the number of overlapping cases between help-seeking (GPpsy in red), symptom (DepAll, in blue), self-report (SelfRepDep, in green), DSM-V (LifetimeMDD, in purple) based definitions of MDD, as well as the help-seeking, no-MDD definition that excludes MDD (GPNoDep, in orange). As not all individuals answered all questions necessary to assess whether they are a case or control in any of the definitions of MDD, we also show in b) the number of overlapping individuals (both cases and controls) who answered the question necessary to qualify as either cases or controls in each of the definitions of MDD (refer to main text and Figure 1 for details).



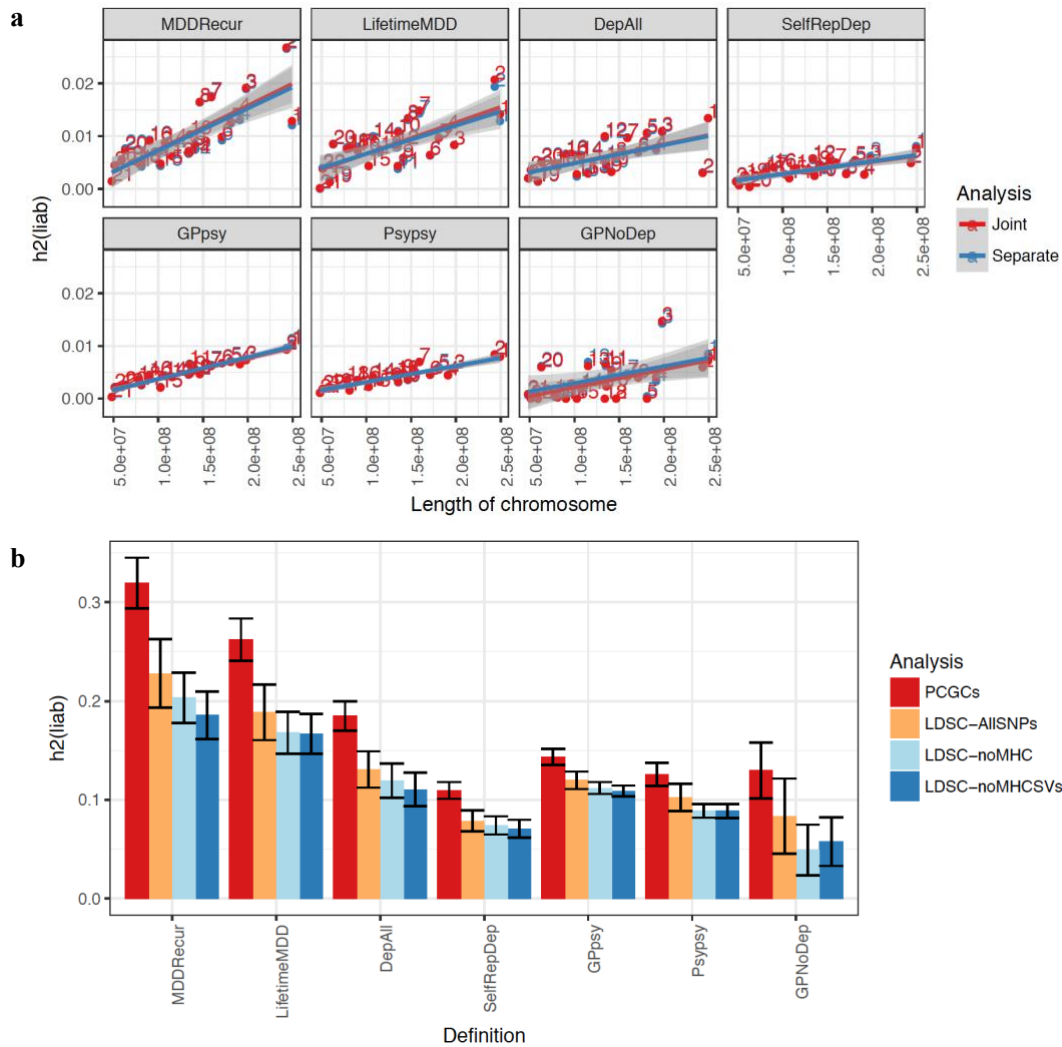

### Supplemental Figure S2: Effects of population structure and MHC/SVs

a) This figure shows for each definition of MDD in UKBiobank the estimates of heritability (on the liability scale) contributed by each chromosome (obtained using BOLT-REML, see Supplemental Methods) estimated both jointly (in red) and separately (in blue), plotted against the lengths of the chromosomes, using both PCs obtained from the whole White-British cohort in UKBiobank. b) This figure shows for each definition of MDD in UKBiobank estimates of heritability (on the liability scale) from PCGCs (using all SNPs > 5% MAF, in red), which specifically models the binary structure of disease traits and contribution from covariates accordingly, and that from LDSC performed on summary statistics from logistic regression between with covariates all SNPs in GWAS and each definition of MDD (what is commonly used in analysis): LDSC-AllSNPs (using all SNPs > 5% MAF, in orange), as well as LDSC-noMHC (using all SNPs > 5% MAF except those in the MHC region on chromosome 6:25-35MB, in light blue), and LDSC-noMHCSVs (using all SNPs > 5% MAF except those in the MHC region and SVs<sup>5</sup>, in dark blue).

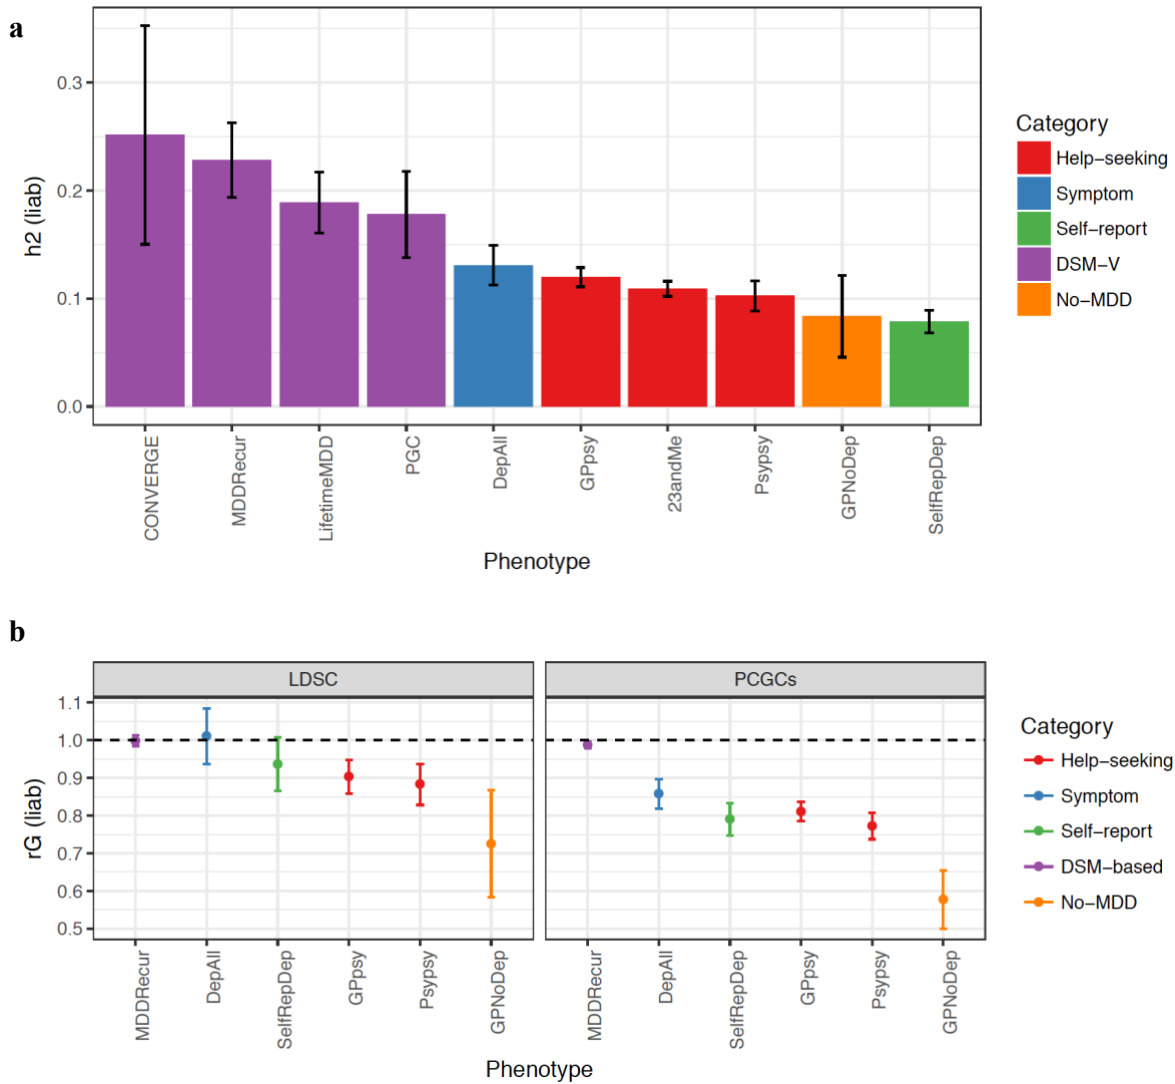

### Supplemental Figure S3: LDSC estimates of heritability and genetic correlation

a) This figure shows the heritability estimates of definitions of MDD in UKBiobank from LDSC using logistic regression summary statistics on all SNPs > 5% MAF (Methods). In the figure we also show LDSC estimates of heritabilities of previous studies of MDD including CONVERGE<sup>15</sup>, PGC1-MDD<sup>18</sup>, and 23andMe<sup>17</sup>, where we show DSM-based definitions in UKBiobank (in purple) show similar estimates to CONVERGE, symptom-based definitions in UKBiobank (in blue) are similar to PGC1-MDD, while help-seeking based (in red) definitions in UKBiobank are similar to 23andMe. b) This figure shows the genetic correlation between all definitions of MDD in UKBiobank against a DSM-based definition of MDD (LifetimeMDD) estimated in LDSC and PCGCs (duplicated from Figure 3b for comparison).

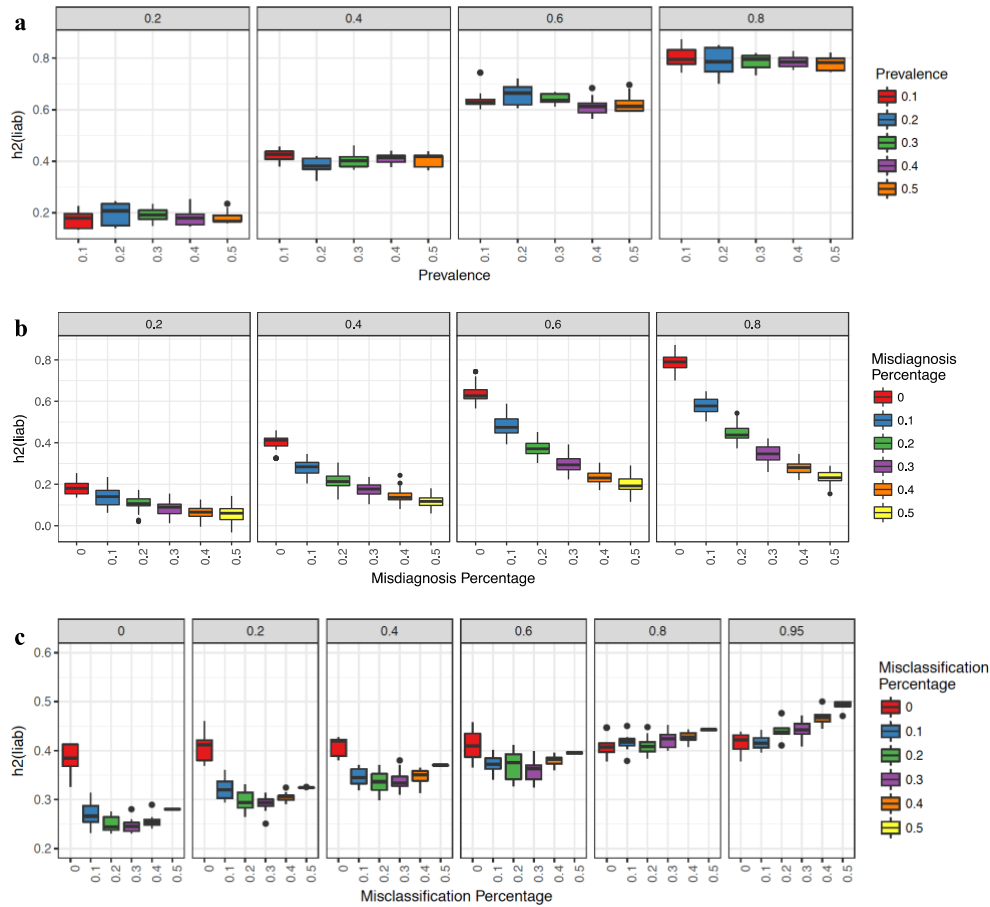

### Supplemental Figure S4: Simulations of misdiagnosis and misclassification

a) This figure shows the estimated heritability (using `--pcgc` option with `--prevalence K` in LDAK, plotted on the y axis) of binary traits  $y_i$ , where  $i \in \{1..10\}$  with simulated heritabilities  $h_i^2 \in \{0.2, 0.4, 0.6, 0.8\}$  (in the grey bars above each panel) plotted against the prevalence  $K_i \in \{0.1, 0.2, 0.3, 0.4, 0.5\}$  of cases (defined as those individuals with liabilities greater than 1-Kth percentile). b) This figure shows the estimated heritability (using `--pcgc` option with `--prevalence K_i` in LDAK, plotted on the y axis) of binary traits  $y_i$ , where  $i \in \{1..10\}$  with simulated heritabilities  $h_i^2 \in \{0.2, 0.4, 0.6, 0.8\}$  (in the grey bars above each panel), for each of which all cases (at prevalence  $K_i=0.2$ ) are correctly identified as cases, while varying numbers of random controls are misdiagnosed as cases (plotted on the x axis as percentage of all identified cases). c) This figure shows the estimated heritability (using `--pcgc` option with `--prevalence K` in LDAK, plotted on the y axis) of binary traits  $y_{i,1}$ , where  $i \in \{1..10\}$  with simulated heritability  $h_{i,1}^2 = 0.4$ , for each of which all cases at prevalence  $K_{i,1} = 0.2$  are correctly identified as cases, while varying numbers of misclassifications from cases of a genetically correlated binary trait  $y_{i,2}$ , where  $i \in \{1..10\}$  of equal heritability and prevalence as cases of  $y_{i,1}$ . Genetic correlations between  $y_{i,1}$  and  $y_{i,2}$   $rG_i \in \{0, 0.2, 0.4, 0.6, 0.8, 0.95\}$  are shown in the grey bars above each panel.

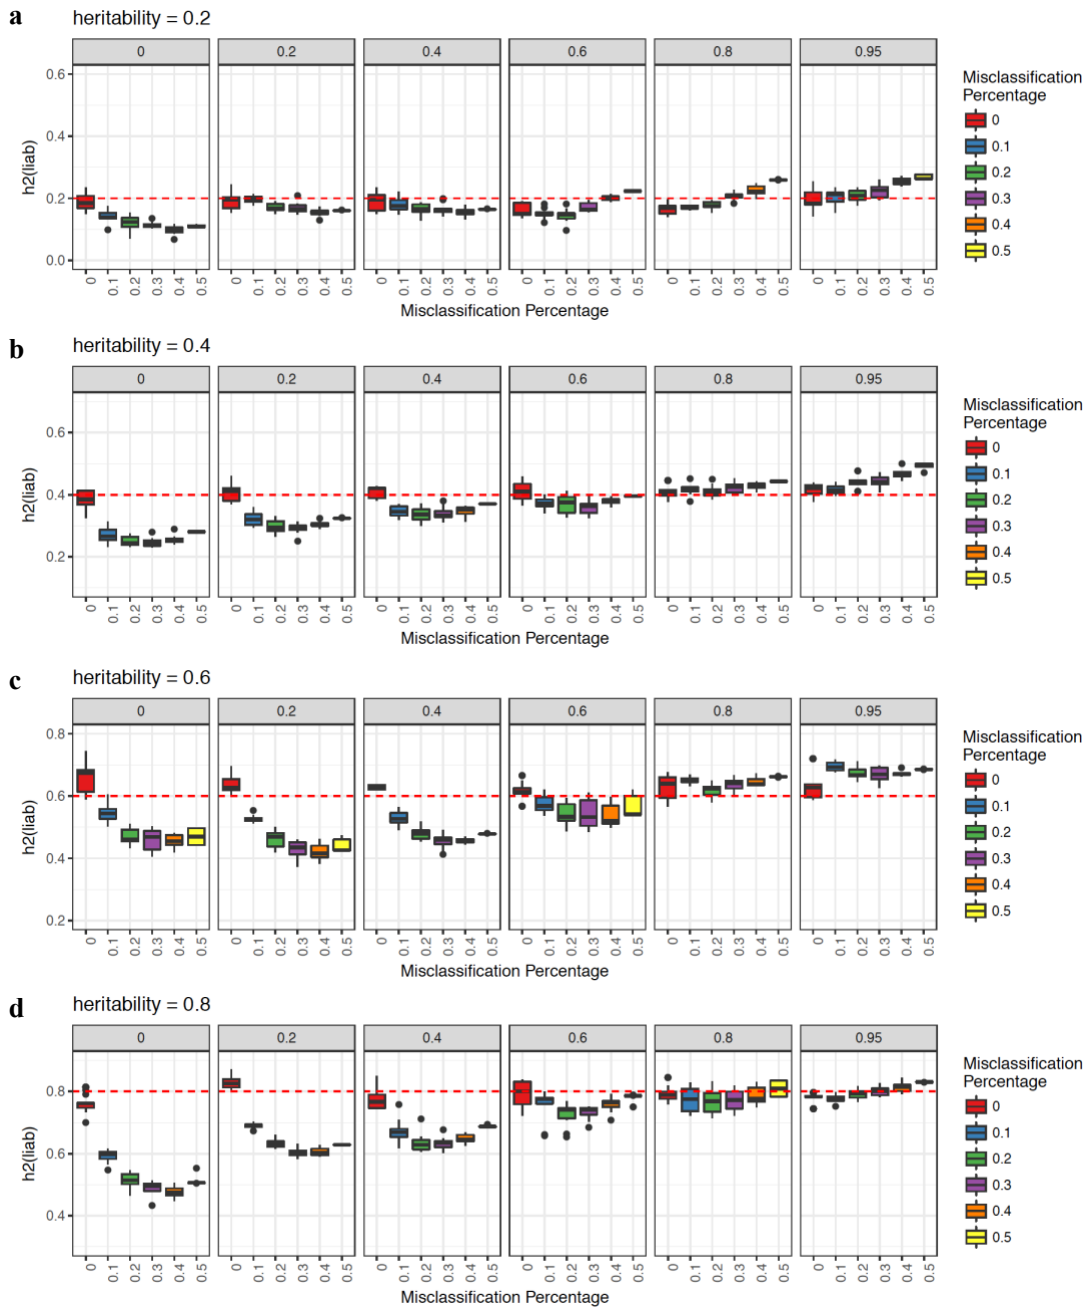

**Supplemental Figure S5: Simulations of misclassification at different heritabilities**

a-d) These figures shows the estimated heritability (using --pcgc option with --prevalence K in LDAK, plotted on the y axis) of binary traits ( $y_{i,1}$ , where  $i \in \{1..10\}$ ) with simulated heritability 0.2, 0.4, 0.6, and 0.8, for each of which all cases (at prevalence  $K_{i,1}=0.2$ ) are correctly identified as cases, while varying numbers of cases misclassified from a genetically correlated binary trait ( $y_{i,2}$ , where  $i \in \{1..10\}$ ) of equal heritability and prevalence as cases of  $y_{i,1}$ . Genetic correlations between  $y_{i,1}$  and  $y_{i,2}$  ( $rG_i \in \{0, 0.2, 0.4, 0.6, 0.8, 0.95\}$ ) are shown in the grey bars above each panel.

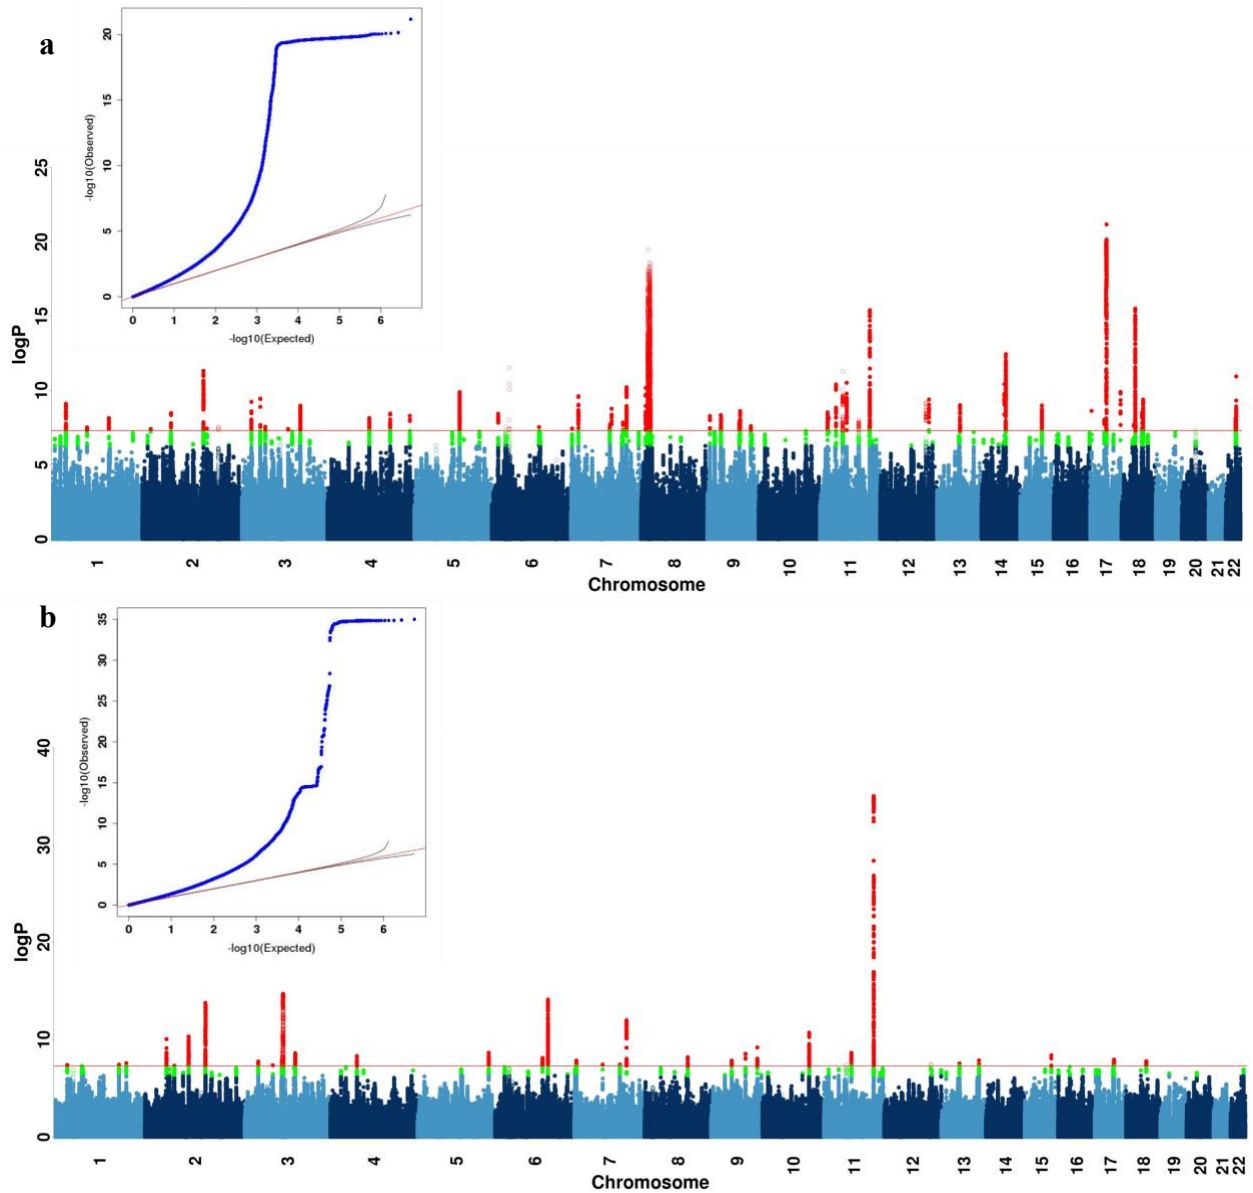

**Supplemental Figure S6: GWAS on neuroticism and smoking in UKBiobank**

This figure shows the manhattan plot of neuroticism score (data field 20127, quantitative trait from 0 to 12) in 274,107 individuals and ever smoked status (data field 20160, binary trait of 0 for “No”, and 1 for “Yes”) in 336,066 individuals in UKBiobank using linear regression on all 8,968,716 common SNPs (MAF > 5% in all 337,198 White-British, unrelated samples) for all the above analyses in PLINK (version 1.9)<sup>23</sup> with 20 PCs and genotyping array as covariates. We report all associations with P values smaller than  $5 \times 10^{-8}$  as genome-wide significant (red). We indicated the SNPs in SVs and the MHC in all manhattan plots as hollow points instead of solid points due to lack of control for population structure in these regions, and show all top SNPs within peaks (1MB regions) in Supplemental Tables S10-11.

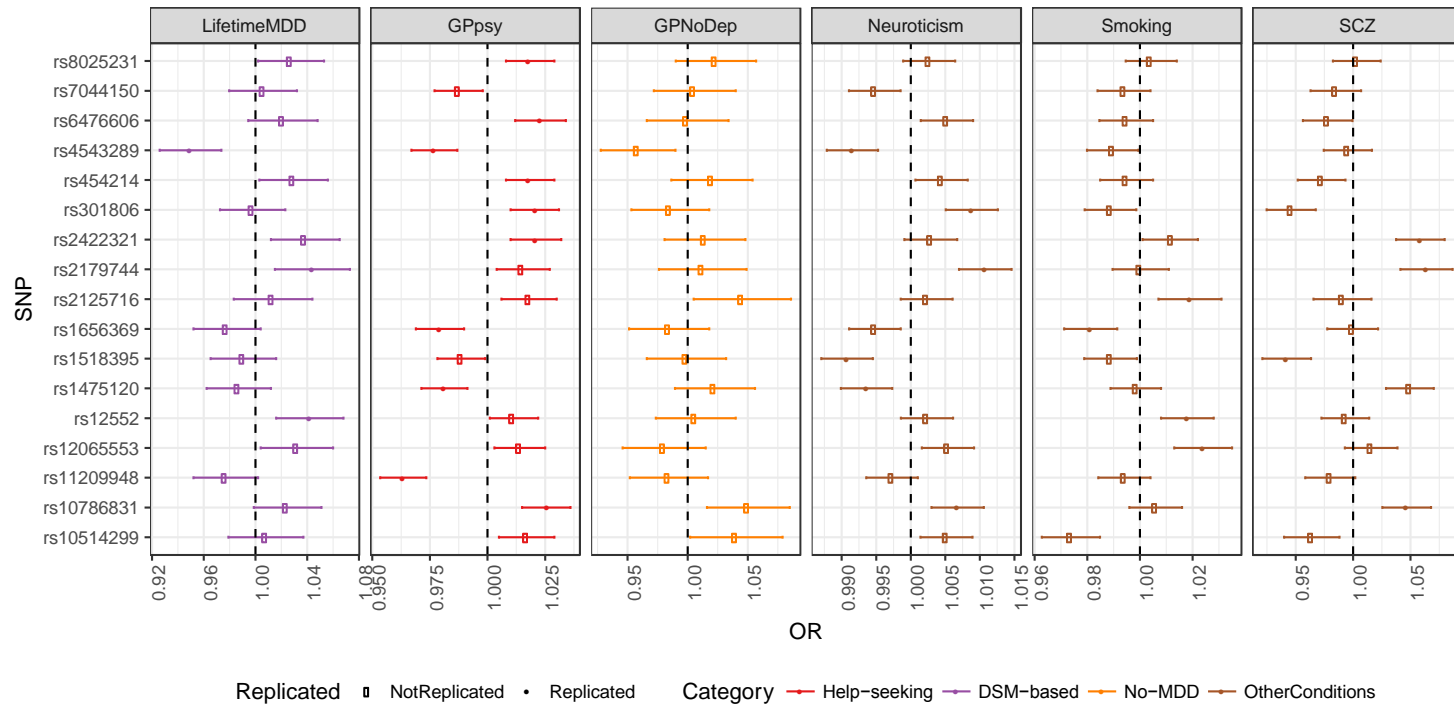

### Supplemental Figure S7: GWAS hits from 23andMe are not specific to MDD

a) This figure shows how many out of at 17 loci significantly associated with help-seeking based definitions of MDD in 23andMe<sup>17</sup> show significant effects in DSM (LifetimeMDD, in purple), help-seeking (GPpsy, in red), and no-MDD help-seeking (GPNoDep, in orange) definitions of MDD, as well as risk factors and conditions other than MDD: neuroticism, smoking and SCZ<sup>24</sup> (all in brown). b) This figure shows the odds ratios (ORs) at 17 loci significantly associated with help-seeking based definitions of MDD in 23andMe<sup>17</sup>, in GWAS conducted on DSM (LifetimeMDD, in purple), help-seeking (GPpsy in red) and no-MDD (GPNoDep, in orange) based definitions of MDD, as well as conditions other than MDD: neuroticism, smoking and SCZ (all in brown). SNPs missing in each panel are not tested in the respective GWAS. For clarity of display, scales on different panels vary to accommodate the different magnitudes of ORs of SNPs in different conditions. ORs at all 17 loci are highly consistent across phenotypes, regardless of whether it is a definition or MDD or a risk factor or condition other than MDD. All results are shown in Supplemental Table S15.

**Supplemental Table**

| <b>ABBREVIATION</b> | <b>PHENOTYPE</b> | <b>COLLECTION STRATEGY</b>                         | <b>STUDY TYPE</b>                                   | <b>REFERENCE</b>                                                             | <b>N</b> | <b>SAMPLE PREV</b> | <b>POPULATION PREV</b> | <b>PREVALENCE REFERENCE</b>             |
|---------------------|------------------|----------------------------------------------------|-----------------------------------------------------|------------------------------------------------------------------------------|----------|--------------------|------------------------|-----------------------------------------|
| <b>CONVERGE</b>     | <b>MDD</b>       | Hospital based psychiatrist diagnosis              | case-ascertained, screened-controls                 | CONVERGE Consortium, 2015 <sup>15</sup>                                      | 10640    | 0.50               | 0.08                   | CONVERGE Consortium, 2015 <sup>15</sup> |
| <b>PGC1</b>         | <b>MDD</b>       | Structured telephone interviews                    | case-ascertained, screened-controls (mega-analysis) | MDD Working Group of the Psychiatric Genomics Consortium, 2013 <sup>18</sup> | 18759    | 0.50               | 0.15                   | Kessler et al., 2003 <sup>25</sup>      |
| <b>23andMe</b>      | <b>MDD</b>       | Minimal phenotyping: self-report via questionnaire | unascertained population cohort                     | Hyde et al., 2016 <sup>17</sup>                                              | 307354   | 0.25               | 0.25                   | Hyde et al., 2016 <sup>17</sup>         |
| <b>ADHD</b>         | <b>ADHD</b>      | Hospital based psychiatrist diagnosis              | case-ascertained, screened-controls (mega-analysis) | Demontis et al., 2017 <sup>26</sup>                                          | 53293    | 0.36               | 0.05                   | Demontis et al., 2017 <sup>26</sup>     |

|            |            |                                                                   |                                                              |                                                                                           |        |      |          |                                                                                        |
|------------|------------|-------------------------------------------------------------------|--------------------------------------------------------------|-------------------------------------------------------------------------------------------|--------|------|----------|----------------------------------------------------------------------------------------|
| <b>BIP</b> | <b>BIP</b> | Hospital based psychiatrist diagnosis                             | case-ascertained, 33% screened-controls (mega-analysis)      | Bipolar Disorder Working Group of the Psychiatric Genomics Consortium, 2011 <sup>27</sup> | 16731  | 0.45 | 0.025    | Merikangas et al., 2011 <sup>28</sup>                                                  |
| <b>SCZ</b> | <b>SCZ</b> | Hospital based psychiatrist diagnosis /semi-structured interviews | case-ascertained, population-controls; trios (mega-analysis) | Schizophrenia Working Group of the Psychiatric Genomics Consortium, 2014 <sup>24</sup>    | 150064 | 0.25 | 0.01     | Schizophrenia Working Group of the Psychiatric Genomics Consortium, 2014 <sup>24</sup> |
| <b>AUT</b> | <b>AUT</b> | Hospital based psychiatrist diagnosis                             | trios; case-ascertained, population-controls (mega-analysis) | Cross-Disorder Group of the Psychiatric Genomics Consortium, 2013 <sup>29</sup>           | 10610  | 0.50 | 9.00E-04 | Cross-Disorder Group of the Psychiatric Genomics Consortium, 2013 <sup>29</sup>        |

**Supplemental Table S1: Other studies referenced in this paper**

This table shows the studies from which we obtain GWAS summary statistics for MDD and other psychiatric conditions that we reference in this paper. The columns are abbreviations of the studies used in this paper, the disease phenotype in question, their case collection strategy, their study type where known, the study reference, number of samples involved, case prevalence in sample, population prevalence of disease phenotypes, and reference for population prevalence of disease prevalence if different from the reference of the study itself.



| <b>DSM CRITERIA</b> | <b>DATA FIELD</b> | <b>QUESTION ON LIFETIME MDD</b>                                                                                                                                         | <b>QUALIFYING ANSWERS</b>                                                                   | <b>N_YES</b> | <b>N_NO</b> |
|---------------------|-------------------|-------------------------------------------------------------------------------------------------------------------------------------------------------------------------|---------------------------------------------------------------------------------------------|--------------|-------------|
| A1                  | 20446             | Have you ever had a time in your life when you felt sad, blue, or depressed for two weeks or more in a row?                                                             | Yes                                                                                         | 59409        | 50018       |
| A2                  | 20441             | Have you ever had a time in your life lasting two weeks or more when you lost interest in most things like hobbies, work, or activities that usually give you pleasure? | Yes                                                                                         | 42565        | 66830       |
| A3                  | 20536             | Did you gain or lose weight without trying, or did you stay about the same weight?                                                                                      | Gained weight,<br>Lost weight, Both<br>gained and lost<br>some weight<br>during the episode | 30875        | 21324       |
| A4                  | 20532             | Did your sleep change?                                                                                                                                                  | Yes                                                                                         | 41955        | 10714       |
| A6                  | 20449             | Did you feel more tired out or low on energy than is usual for you?                                                                                                     | Yes                                                                                         | 45034        | 10072       |
| A7                  | 20450             | People sometimes feel down on themselves, no good, worthless. Did you feel this way?                                                                                    | Yes                                                                                         | 28865        | 28472       |
| A8                  | 20435             | Did you have a lot more trouble concentrating than usual?                                                                                                               | Yes                                                                                         | 42568        | 11592       |
| A9                  | 20437             | Did you think a lot about death - either your own, someone else's or death in general?                                                                                  | Yes                                                                                         | 29946        | 27856       |
| <b>DSM CRITERIA</b> | <b>DATA FIELD</b> | <b>QUESTION ON CURRENT MDD:<br/>Over the last 2 weeks, how often have you been bothered by any of the following problems?</b>                                           | <b>QUALIFYING ANSWERS</b>                                                                   | <b>N_YES</b> | <b>N_NO</b> |
| A1                  | 20510             | Feeling down, depressed, or hopeless                                                                                                                                    | Nearly every day                                                                            | 1449         | 108261      |

|    |       |                                                                                                                                                                          |                  |      |        |
|----|-------|--------------------------------------------------------------------------------------------------------------------------------------------------------------------------|------------------|------|--------|
| A2 | 20514 | Little interest or pleasure in doing things                                                                                                                              | Nearly every day | 1670 | 108040 |
| A3 | 20511 | Poor appetite or overeating                                                                                                                                              | Nearly every day | 2633 | 107077 |
| A4 | 20517 | Trouble falling or staying asleep, or sleeping too much                                                                                                                  | Nearly every day | 8616 | 101094 |
| A5 | 20518 | Moving or speaking so slowly that other people could have noticed? Or the opposite - being so fidgety or restless that you have been moving around a lot more than usual | Nearly every day | 650  | 109060 |
| A6 | 20519 | Feeling tired or having little energy                                                                                                                                    | Nearly every day | 5968 | 103742 |
| A7 | 20507 | Feeling bad about yourself or that you are a failure or have let yourself or your family down                                                                            | Nearly every day | 2166 | 107544 |
| A8 | 20508 | Trouble concentrating on things, such as reading the newspaper or watching television                                                                                    | Nearly every day | 1769 | 107941 |
| A9 | 20513 | Thoughts that you would be better off dead or of hurting yourself in some way                                                                                            | Nearly every day | 357  | 109353 |

**Supplemental Table S2: DSM-based criteria for lifetime and current MDD**

This table lists questions in the online mental health follow up questionnaire in UKBiobank forming the DSM-V diagnostic criteria for lifetime MDD<sup>3</sup> (Question on lifetime MDD) and current MDD (Question on current MDD), along with their data field in UKBiobank data showcase (datafield), the DSM criteria they correspond to, and the multiple-choice answer to each of the questions which indicates a subject as self-reporting having the symptom.

| CENTRE          | DEFINITION OF DEPRESSION (N_CASES/N_CONTROLS) |           |            |             |              |            |           |
|-----------------|-----------------------------------------------|-----------|------------|-------------|--------------|------------|-----------|
|                 | DSM-BASED                                     |           | SYMPTOM    | SELF-REPORT | HELP-SEEKING |            | NON-MDD   |
|                 | LifetimeMDD                                   | MDDRecur  | DepAll     | SelfRepDep  | GPpsy        | Psypsy     | GPNoDep   |
| Barts           | 399/1075                                      | 274/1040  | NA         | 292/3623    | 1941/3795    | 1025/4728  | NA        |
| Birmingham      | 869/2333                                      | 563/2239  | 3198/7995  | 816/10902   | 5536/10139   | 1922/13782 | 1186/6769 |
| Bristol         | 1613/5047                                     | 1001/4880 | 1649/4643  | 1534/21046  | 9817/20411   | 2960/27335 | 655/3972  |
| Bury            | 826/2436                                      | 512/2347  | NA         | 1506/15186  | 6971/13005   | 2118/17939 | NA        |
| Cardiff         | 554/1660                                      | 361/1599  | NA         | 603/8663    | 4357/8239    | 1345/11285 | NA        |
| Croydon         | 801/2937                                      | 500/2842  | 2744/7922  | 811/10644   | 4706/9985    | 1791/12915 | 1074/6821 |
| Edinburgh       | 568/2092                                      | 336/2033  | NA         | 551/7368    | 3851/8325    | 1305/10889 | NA        |
| Glasgow         | 480/1605                                      | 309/1565  | NA         | 771/8505    | 4550/7961    | 1553/10998 | NA        |
| Hounslow        | 743/3060                                      | 472/2954  | 2489/7862  | 619/9990    | 4401/9948    | 1741/12642 | 1055/6775 |
| Leeds           | 1503/4312                                     | 932/4146  | NA         | 2058/20840  | 10701/20079  | 3379/27457 | NA        |
| Liverpool       | 1080/3024                                     | 700/2916  | 2651/7765  | 1609/16421  | 7792/14444   | 2377/19930 | 1221/6500 |
| Manchester      | 469/1282                                      | 321/1218  | NA         | 821/6855    | 3244/5654    | 1091/7818  | NA        |
| Middlesborough  | 788/2175                                      | 504/2093  | 2934/8017  | 826/10477   | 5319/9595    | 1447/13520 | 1239/6727 |
| Newcastle       | 1165/3363                                     | 746/3246  | NA         | 1355/18166  | 9120/16690   | 2836/23035 | NA        |
| Nottingham      | 1208/3541                                     | 744/3420  | 676/1929   | 1325/17305  | 8178/15766   | 2515/21492 | 281/1639  |
| Oxford          | 455/1695                                      | 274/1639  | NA         | 656/6793    | 3236/6577    | 1148/8690  | NA        |
| Reading         | 999/4126                                      | 614/3995  | NA         | 947/13561   | 6298/14662   | 1950/19033 | NA        |
| Sheffield       | 1125/3218                                     | 731/3081  | 4370/11248 | 1664/16219  | 7656/13696   | 2070/19329 | 1763/9436 |
| Stockport_pilot | 45/90                                         | 27/87     | NA         | 33/247      | 108/207      | 30/287     | NA        |
| Stoke           | 485/1519                                      | 299/1474  | NA         | 874/9823    | 4700/8913    | 1443/12210 | NA        |
| Swansea         | 93/228                                        | 59/221    | 360/762    | 107/1147    | 609/964      | 188/1385   | 127/632   |
| Wrexham         | 33/52                                         | 23/48     | 106/255    | 27/333      | 169/307      | 52/427     | 31/222    |

**Supplemental Table S3: Number of samples by assessment centre**

This table lists the number of cases (N\_cases) and controls (N\_controls) collected for each of the definitions in UKBiobank in the categories DSM-based, Symptom, Self-report, Help-seeking, and no-MDD collected in each assessment centre. “NA” denotes no collection of answers to questions that form diagnostic criteria to the relevant definition of MDD in an assessment centre.

| <b>CATEGORY</b> | <b>DEFINITION</b> | <b>NSAMPLES</b> | <b>PREV</b> | <b>CORRECTED_PREV</b> |
|-----------------|-------------------|-----------------|-------------|-----------------------|
| DSM-based       | LifetimeMDD       | 67171           | 0.243       | 0.268                 |
| DSM-based       | MDDRecur          | 59385           | 0.173       | 0.196                 |
| Symptom         | DepAll            | 79576           | 0.266       | 0.279                 |
| Self-report     | SelfRepDep        | 253926          | 0.078       | 0.084                 |
| Help-seeking    | GPpsy             | 332629          | 0.341       | 0.343                 |
| Help-seeking    | Psypsy            | 333419          | 0.109       | 0.111                 |
| Non-MDD         | GPNoDep           | 58125           | 0.149       | 0.146                 |

**Supplemental Table S4: Prevalence of each definition of MDD**

This table shows for each definition of MDD in UKBiobank the category we assign it to (DSM-based, Symptom, Self-report, Help-seeking, or no-MDD), the number of samples (both cases and controls), the case prevalence (prev), and the case prevalence when corrected for age group, sex and population in each assessment centre where samples are collected. Correction factors for age, sex and population in each assessment centre are shown in Supplemental Tables S5,6.

| CENTRE          | UKBIOBANK |          | CENSUS_2011 |              | CORRECTION |
|-----------------|-----------|----------|-------------|--------------|------------|
|                 | N_SAMPLE  | FRACTION | POPULATION  | POP_FRACTION |            |
| Cardiff         | 12678     | 0.038    | 346090      | 0.044        | 1.151      |
| Sheffield       | 21479     | 0.064    | 552698      | 0.070        | 1.085      |
| Hounslow        | 14439     | 0.043    | 253957      | 0.032        | 0.742      |
| Leeds           | 30964     | 0.093    | 751485      | 0.095        | 1.023      |
| Croydon         | 14778     | 0.044    | 363378      | 0.046        | 1.037      |
| Birmingham      | 15783     | 0.047    | 1073045     | 0.135        | 2.866      |
| Bristol         | 30406     | 0.091    | 428234      | 0.054        | 0.594      |
| Nottingham      | 24106     | 0.072    | 305680      | 0.039        | 0.535      |
| Reading         | 21050     | 0.063    | 155698      | 0.020        | 0.312      |
| Liverpool       | 22399     | 0.067    | 466415      | 0.059        | 0.878      |
| Newcastle       | 25963     | 0.078    | 280177      | 0.035        | 0.455      |
| Stoke           | 13705     | 0.041    | 249008      | 0.031        | 0.766      |
| Middlesborough  | 15024     | 0.045    | 138412      | 0.017        | 0.388      |
| Manchester      | 8949      | 0.027    | 503127      | 0.063        | 2.370      |
| Bury            | 20138     | 0.060    | 185060      | 0.023        | 0.387      |
| Glasgow         | 12589     | 0.038    | 593245      | 0.075        | 1.987      |
| Oxford          | 9865      | 0.029    | 151906      | 0.019        | 0.649      |
| Edinburgh       | 12224     | 0.037    | 476626      | 0.060        | 1.644      |
| Barts           | 5779      | 0.017    | 7375        | 0.001        | 0.054      |
| Wrexham         | 481       | 0.001    | 134844      | 0.017        | 11.819     |
| Stockport_pilot | 317       | 0.001    | 283275      | 0.036        | 37.675     |
| Swansea         | 1583      | 0.005    | 239023      | 0.030        | 6.366      |

**Supplemental Table S5: Correction for population in assessment centres**

This table shows the number of samples (N\_sample) and the fraction of total sample size (fraction) from each assessment centre in UKBiobank, as well as the population in cities where each of the collection centres are located (population) and the fraction of the UK population they represent (pop\_fraction) according to the UK Census 2011. Only cities where there are UKBiobank assessment centres are included in this table and considered when calculating fractions of the UK population. The correction factor (correction) is the ratio between the population fraction and sample fraction, and is multiplied to the case prevalence of each definition of MDD from each assessment centre when calculating the corrected prevalence for each definition of MDD across all assessment centres, along with correction factors for age and sex as shown in Supplemental Table S6.

| AGE     | UKBIOBANK |       |          | CENSUS_2011 |          | CORRECTION |        |
|---------|-----------|-------|----------|-------------|----------|------------|--------|
|         | N_SAMPLE  | % AGE | % FEMALE | % AGE       | % FEMALE | AGE        | FEMALE |
| 39to44  | 31412     | 9.4   | 53.3     | 17.6        | 50.1     | 1.875      | 0.940  |
| 45to49  | 41684     | 12.5  | 55.3     | 17.7        | 50.3     | 1.421      | 0.909  |
| 50to54  | 49730     | 14.9  | 56.3     | 15.6        | 50.6     | 1.050      | 0.898  |
| 55to59  | 60517     | 18.1  | 55.4     | 13.8        | 50.6     | 0.763      | 0.913  |
| 60to64  | 84850     | 25.4  | 53.7     | 14.5        | 50.4     | 0.572      | 0.938  |
| above65 | 66506     | 19.9  | 49.6     | 26.0        | 50.8     | 1.308      | 1.023  |

**Supplemental Table S6: Correction for age and sex**

This table shows the number of samples (N\_sample) and the fraction of total sample size of each age group (% age) as well as fraction of females (% female) per age group in UKBiobank, as well as the fraction of the UK population from each age group (% age) and who are female (% female) per age group according to the UK Census 2011. Only age groups of those ages of samples included in UKBiobank are shown in this table and considered when calculating fractions of each age group and sex. Correction factors (age, sex) are the ratios between the population fraction and sample fraction of each age group and sex, and are multiplied to the case prevalence of each definition of MDD along with correction factors for assessment centre population as shown in Supplemental Table S5 when calculating the corrected prevalence for each definition of MDD.

| DATAFIELD | QUESTION ON CHILDHOOD TRAUMA<br>"When I was growing up..."                                      | RESPONSE AND SCORE (0/1)   |            |                |                   |               |                       | OR for<br>LifetimeMDD |
|-----------|-------------------------------------------------------------------------------------------------|----------------------------|------------|----------------|-------------------|---------------|-----------------------|-----------------------|
|           |                                                                                                 | Prefer<br>not to<br>answer | Never true | Rarely<br>true | Sometimes<br>true | Often<br>true | Very<br>often<br>true |                       |
| 20487     | I felt that someone in my family hated me                                                       | NA                         | 0          | 0              | 0                 | 1             | 1                     | 1.799                 |
| 20488     | People in my family hit me so hard that it left me with bruises or marks                        | NA                         | 0          | 0              | 1                 | 1             | 1                     | 1.215                 |
| 20489     | I felt loved                                                                                    | NA                         | 1          | 1              | 1                 | 0             | 0                     | 1.664                 |
| 20490     | Someone molested me (sexually)                                                                  | NA                         | 0          | 1              | 1                 | 1             | 1                     | 1.174                 |
| 20491     | There was someone to take me to the doctor if I needed it                                       | Question omitted           |            |                |                   |               |                       |                       |
| DATAFIELD | QUESTION ON ADULTHOOD TRAUMA<br>"Since I was sixteen..."                                        | RESPONSE AND SCORE (0/1)   |            |                |                   |               |                       | OR for<br>LifetimeMDD |
|           |                                                                                                 | Prefer<br>not to<br>answer | Never true | Rarely<br>true | Sometimes<br>true | Often<br>true | Very<br>often<br>true |                       |
| 20521     | A partner or ex-partner repeatedly belittled me to the extent that I felt worthless             | NA                         | 0          | 0              | 1                 | 1             | 1                     | 2.388                 |
| 20522     | I have been in a confiding relationship                                                         | NA                         | 1          | 1              | 0                 | 0             | 0                     | 1.039                 |
| 20525     | There was money to pay the rent or mortgage when I needed it                                    | NA                         | 1          | 1              | 1                 | 0             | 0                     | 1.311                 |
| 20523     | A partner or ex-partner deliberately hit me or used violence in any other way                   | Question omitted           |            |                |                   |               |                       |                       |
| 20524     | A partner or ex-partner sexually interfered with me, or forced me to have sex against my wishes | Question omitted           |            |                |                   |               |                       |                       |



| DATAFIELD | QUESTION FOR LIFETIME TRAUMA<br>"In your life, have you...?"                               | RESPONSE AND SCORE (0/1) |       |                                       |                                   | OR for<br>LifetimeMDD |
|-----------|--------------------------------------------------------------------------------------------|--------------------------|-------|---------------------------------------|-----------------------------------|-----------------------|
|           |                                                                                            | Prefer not to<br>answer  | Never | Yes, but not in the<br>last 12 months | Yes, within the last<br>12 months |                       |
| 20526     | Been in a serious accident that you believed to be life-threatening at the time            | NA                       | 0     | 1                                     | 1                                 | 1.326                 |
| 20527     | Been involved in combat or exposed to a war-zone (either in the military or as a civilian) | Question omitted         |       |                                       |                                   |                       |
| 20528     | Been diagnosed with a life-threatening illness                                             | NA                       | 0     | 1                                     | 1                                 | 1.275                 |
| 20529     | Been attacked, mugged, robbed, or been the victim of a physically violent crime            | NA                       | 0     | 1                                     | 1                                 | 1.145                 |
| 20530     | Witnessed a sudden violent death (eg. murder, suicide, aftermath of an accident)           | NA                       | 0     | 1                                     | 1                                 | 1.288                 |
| 20531     | Been a victim of a sexual assault, whether by a stranger or someone you knew               | NA                       | 0     | 1                                     | 1                                 | 1.339                 |

### Supplemental Table S7: Derivation of lifetime trauma score

This table lists questions in the online mental health follow up questionnaire in UKBiobank forming the derivation of lifetime trauma score used in this paper (Supplemental Methods), along with their data field in the UKBiobank data showcase. The questions come in three categories, “Questions on childhood trauma”, “Questions on adulthood trauma”, and “Question for lifetime trauma”. Answers to questions that are of high similarity with another question are excluded from the calculation of lifetime trauma score (Question omitted). We show the multiple-choice answer to each of the question which indicates a subject as self-reporting having experienced the traumatic life event. We also show the odds ratio (OR) of having experienced each of the traumatic life event on DSM-based LifetimeMDD, when modelled jointly with all other traumatic life events, as well as age, sex, years of education, neuroticism, townsend deprivation index, experience of any traumatic life event in the past 2 years (data field 6145), and total number of traumatic life events reported. We then weight each of the traumatic life events by its OR and sum all weighted scores to arrive at a weighted lifetime trauma score for each individual.

| PHENOTYPE    |             |       |           | PCGCs |       |        |           | LDSC  |       | BOLT-REML |       |
|--------------|-------------|-------|-----------|-------|-------|--------|-----------|-------|-------|-----------|-------|
| CATEGORY     | DEFINITION  | PREV  | N_SAMPLES | H2    | SE    | GENVAR | GENVAR_SE | H2    | SE    | H2        | SE    |
| DSM-based    | LifetimeMDD | 0.243 | 67171     | 0.262 | 0.022 | 0.263  | 0.022     | 0.189 | 0.028 | 0.184     | 0.012 |
| DSM-based    | MDDRecur    | 0.173 | 59385     | 0.320 | 0.026 | 0.321  | 0.026     | 0.228 | 0.035 | 0.218     | 0.016 |
| Symptom      | DepAll      | 0.266 | 79576     | 0.185 | 0.015 | 0.185  | 0.015     | 0.131 | 0.018 | 0.132     | 0.010 |
| Self-report  | SelfRepDep  | 0.078 | 253926    | 0.110 | 0.009 | 0.110  | 0.009     | 0.079 | 0.010 | 0.077     | 0.006 |
| Help-seeking | GPpsy       | 0.341 | 332629    | 0.143 | 0.008 | 0.144  | 0.008     | 0.120 | 0.009 | 0.109     | 0.003 |
| Help-seeking | Psypsy      | 0.109 | 333419    | 0.128 | 0.012 | 0.126  | 0.012     | 0.103 | 0.014 | 0.090     | 0.004 |
| Non-MDD      | GPNoDep     | 0.149 | 58125     | 0.130 | 0.028 | 0.130  | 0.028     | 0.084 | 0.038 | 0.052     | 0.015 |

**Supplemental Table S8: Heritability estimates of definitions of MDD from different methods**

This table shows the heritability estimates of each definition of MDD calculated using three different methods, PCGCs, LDSC, and BOLD-REML, as detailed in Supplemental Methods. For each definition of MDD we show the sample size (N\_sample) and prevalence (prev), and for each method we show the heritability estimate (h2) and its standard error (se). For PCGCs, we also show the genetic variance (genvar) and its standard error (genvar\_se), the comparable measure to heritability from the other two methods (Supplemental Methods).

| RISK FACTOR  | PHENOTYPE    |                  | N_SAMPLE<br>(PREV)                    | H2<br>(SE)        | N_SAMPLE<br>(PREV)                   | H2<br>(SE)       | DIFFERENCE |        |                |                  |
|--------------|--------------|------------------|---------------------------------------|-------------------|--------------------------------------|------------------|------------|--------|----------------|------------------|
|              | CATEGORY     | DEFINITION       | AGE >= 60                             |                   | AGE < 60                             |                  | ΔH2        | DF     | T-TEST<br>STAT | T-TEST<br>PVALUE |
| AGE          | DSM-based    | LifetimeMDD      | 27671<br>(0.166)                      | 0.298<br>(0.039)  | 39500<br>(0.297)                     | 0.312<br>(0.027) | 0.015      | 52168  | -0.310         | 3.78E-01         |
|              | DSM-based    | MDDRecur         | 24894<br>(0.106)                      | 0.256<br>(0.048)  | 34491<br>(0.222)                     | 0.387<br>(0.038) | 0.132      | 51023  | -2.142         | 1.61E-02         |
|              | Symptom      | DepAll           | 38683<br>(0.224)                      | 0.215<br>(0.027)  | 40893<br>(0.306)                     | 0.232<br>(0.022) | 0.017      | 76179  | -0.503         | 3.07E-01         |
|              | Self-report  | SelfRepDep       | 126331<br>(0.058)                     | 0.141<br>(0.016)  | 127595<br>(0.098)                    | 0.129<br>(0.013) | -0.012     | 243413 | 0.587          | 2.79E-01         |
|              | Help-seeking | GPpsy            | 150368<br>(0.318)                     | 0.151<br>(0.014)  | 182261<br>(0.359)                    | 0.153<br>(0.008) | 0.002      | 233073 | -0.143         | 4.43E-01         |
|              | Help-seeking | Psypsy           | 150840<br>(0.104)                     | 0.150<br>(0.015)  | 182579<br>(0.113)                    | 0.124<br>(0.012) | -0.026     | 301479 | 1.303          | 9.63E-02         |
|              | No-MDD       | GPNoDep          | 29866<br>(0.152)                      | 0.208<br>(0.044)  | 28259<br>(0.145)                     | 0.153<br>(0.041) | -0.055     | 58049  | 0.920          | 1.79E-01         |
| DEPRIVATION  | CATEGORY     | DEFINITION       | TOWNSEND<br>DEPRIVATION<br>INDEX >= 0 |                   | TOWNSEND<br>DEPRIVATION<br>INDEX < 0 |                  | ΔH2        | DF     | T-TEST<br>STAT | T-TEST<br>PVALUE |
|              | DSM-based    | LifetimeMDD      | 13969<br>(0.304)                      | 0.418<br>(0.059)  | 53120<br>(0.226)                     | 0.252<br>(0.025) | -0.166     | 19489  | 2.596          | 4.71E-03         |
|              | DSM-based    | MDDRecur         | 12308<br>(0.239)                      | 0.434<br>(0.073)  | 47013<br>(0.156)                     | 0.338<br>(0.032) | -0.096     | 17400  | 1.212          | 1.13E-01         |
|              | Symptom      | DepAll           | 20435<br>(0.309)                      | 0.325<br>(0.038)  | 59023<br>(0.251)                     | 0.189<br>(0.018) | -0.136     | 30436  | 3.264          | 5.50E-04         |
|              | Self-report  | SelfRepDep       | 65877<br>(0.099)                      | 0.178<br>(0.023)  | 187750<br>(0.071)                    | 0.119<br>(0.011) | -0.059     | 94849  | 2.297          | 1.08E-02         |
| Help-seeking | GPpsy        | 83671<br>(0.390) | 0.149<br>(0.011)                      | 248566<br>(0.324) | 0.145<br>(0.008)                     | -0.004           | 182828     | 0.309  | 3.79E-01       |                  |

|                    |                 |                   |                                            |                  |                                           |                  |            |           |                        |                          |
|--------------------|-----------------|-------------------|--------------------------------------------|------------------|-------------------------------------------|------------------|------------|-----------|------------------------|--------------------------|
|                    | Help-seeking    | Psypsy            | 83835<br>(0.149)                           | 0.154<br>(0.016) | 249190<br>(0.095)                         | 0.119<br>(0.011) | -0.034     | 172056    | 1.724                  | 4.23E-02                 |
|                    | No-MDD          | GPNoDep           | 14046<br>(0.168)                           | 0.311<br>(0.071) | 44004<br>(0.142)                          | 0.143<br>(0.029) | -0.168     | 18912     | 2.203                  | 1.38E-02                 |
| <b>TRAUMA</b>      | <b>CATEGORY</b> | <b>DEFINITION</b> | <b>LIFETIME STRESS<br/>SCORE &gt;= 2.5</b> |                  | <b>LIFETIME STRESS<br/>SCORE &lt; 2.5</b> |                  | <b>ΔH2</b> | <b>DF</b> | <b>T-TEST<br/>STAT</b> | <b>T-TEST<br/>PVALUE</b> |
|                    | DSM-based       | LifetimeMDD       | 19110<br>(0.424)                           | 0.401<br>(0.047) | 48057<br>(0.171)                          | 0.232<br>(0.025) | -0.169     | 30581     | 3.185                  | 7.24E-04                 |
|                    | DSM-based       | MDDRecur          | 16139<br>(0.353)                           | 0.468<br>(0.051) | 47013<br>(0.156)                          | 0.338<br>(0.032) | -0.130     | 35988     | 2.849                  | 2.20E-03                 |
|                    | Symptom         | DepAll            | 8448 (0.408)                               | 0.344<br>(0.076) | 20544<br>(0.219)                          | 0.295<br>(0.049) | -0.048     | 15766     | 0.535                  | 2.96E-01                 |
|                    | Self-report     | SelfRepDep        | 26454<br>(0.117)                           | 0.220<br>(0.047) | 54827<br>(0.057)                          | 0.252<br>(0.032) | 0.032      | 51237     | -0.550                 | 2.91E-01                 |
|                    | Help-seeking    | GPpsy             | 33451<br>(0.447)                           | 0.233<br>(0.028) | 75790<br>(0.277)                          | 0.169<br>(0.015) | -0.064     | 53301     | 1.998                  | 2.28E-02                 |
|                    | Help-seeking    | Psypsy            | 33502<br>(0.160)                           | 0.203<br>(0.033) | 75929<br>(0.072)                          | 0.193<br>(0.031) | -0.011     | 89536     | 0.238                  | 4.06E-01                 |
|                    | No-MDD          | GPNoDep           | 4980 (0.186)                               | 0.759<br>(0.181) | 16007<br>(0.119)                          | 0.308<br>(0.065) | -0.452     | 6333      | 2.349                  | 9.43E-03                 |
| <b>NEUROTICISM</b> | <b>CATEGORY</b> | <b>DEFINITION</b> | <b>NEUROTICISM &gt;= 5</b>                 |                  | <b>NEUROTICISM &lt; 5</b>                 |                  | <b>ΔH2</b> | <b>DF</b> | <b>T-TEST<br/>STAT</b> | <b>T-TEST<br/>PVALUE</b> |
|                    | DSM-based       | LifetimeMDD       | 19043<br>(0.439)                           | 0.381<br>(0.043) | 38003<br>(0.136)                          | 0.289<br>(0.030) | -0.092     | 37284     | 1.746                  | 4.04E-02                 |
|                    | DSM-based       | MDDRecur          | 16148<br>(0.370)                           | 0.451<br>(0.054) | 34367<br>(0.072)                          | 0.315<br>(0.045) | -0.136     | 37543     | 1.948                  | 2.57E-02                 |
|                    | Symptom         | DepAll            | 25691<br>(0.420)                           | 0.212<br>(0.030) | 41428<br>(0.171)                          | 0.183<br>(0.027) | -0.029     | 58976     | 0.711                  | 2.39E-01                 |
|                    | Self-report     | SelfRepDep        | 87606<br>(0.141)                           | 0.106<br>(0.013) | 117206<br>(0.027)                         | 0.194<br>(0.032) | 0.088      | 150998    | -2.567                 | 5.12E-03                 |

|                  |                 |                   |                                 |                  |                                |                  |            |           |                    |                      |
|------------------|-----------------|-------------------|---------------------------------|------------------|--------------------------------|------------------|------------|-----------|--------------------|----------------------|
|                  | Help-seeking    | GPpsy             | 110335<br>(0.513)               | 0.129<br>(0.008) | 160959<br>(0.206)              | 0.115<br>(0.010) | -0.014     | 270728    | 1.067              | 1.43E-01             |
|                  | Help-seeking    | Psypsy            | 110374<br>(0.183)               | 0.118<br>(0.012) | 161225<br>(0.052)              | 0.139<br>(0.015) | 0.021      | 271596    | -1.097             | 1.36E-01             |
|                  | No-MDD          | GPNoDep           | 14841<br>(0.257)                | 0.228<br>(0.054) | 34261<br>(0.088)               | 0.120<br>(0.046) | -0.108     | 35650     | 1.526              | 6.35E-02             |
|                  | <b>CATEGORY</b> | <b>DEFINITION</b> | <b>MALES</b>                    |                  | <b>FEMALES</b>                 |                  | <b>ΔH2</b> | <b>DF</b> | <b>T-TEST STAT</b> | <b>T-TEST PVALUE</b> |
| <b>SEX</b>       | DSM-based       | LifetimeMDD       | 32933<br>(0.167)                | 0.294<br>(0.039) | 34238<br>(0.315)               | 0.328<br>(0.025) | 0.033      | 57293     | -0.719             | 2.36E-01             |
|                  | DSM-based       | MDDRecur          | 29760<br>(0.110)                | 0.360<br>(0.047) | 29625<br>(0.237)               | 0.429<br>(0.033) | 0.069      | 53839     | -1.204             | 1.14E-01             |
|                  | Symptom         | DepAll            | 37728<br>(0.203)                | 0.203<br>(0.034) | 41848<br>(0.323)               | 0.218<br>(0.021) | 0.015      | 64013     | -0.383             | 3.51E-01             |
|                  | Self-report     | SelfRepDep        | 117712<br>(0.058)               | 0.133<br>(0.015) | 136214<br>(0.095)              | 0.125<br>(0.012) | -0.008     | 229531    | 0.432              | 3.33E-01             |
|                  | Help-seeking    | GPpsy             | 153917<br>(0.257)               | 0.149<br>(0.011) | 178712<br>(0.413)              | 0.170<br>(0.009) | 0.021      | 307791    | -1.512             | 6.52E-02             |
|                  | Help-seeking    | Psypsy            | 154190<br>(0.097)               | 0.131<br>(0.016) | 179229<br>(0.119)              | 0.145<br>(0.012) | 0.014      | 293736    | -0.699             | 2.42E-01             |
|                  | No-MDD          | GPNoDep           | 29968<br>(0.112)                | 0.188<br>(0.041) | 28157<br>(0.187)               | 0.228<br>(0.069) | 0.041      | 46298     | -0.507             | 3.06E-01             |
|                  | <b>CATEGORY</b> | <b>DEFINITION</b> | <b>EDUCATION &gt;= 11 YEARS</b> |                  | <b>EDUCATION &lt; 11 YEARS</b> |                  | <b>ΔH2</b> | <b>DF</b> | <b>T-TEST STAT</b> | <b>T-TEST PVALUE</b> |
| <b>EDUCATION</b> | DSM-based       | LifetimeMDD       | 17452<br>(0.244)                | 0.356<br>(0.057) | 19815<br>(0.241)               | 0.295<br>(0.042) | -0.061     | 6872      | -2.259             | 1.20E-02             |
|                  | DSM-based       | MDDRecur          | 15446<br>(0.174)                | 0.424<br>(0.071) | 17652<br>(0.174)               | 0.298<br>(0.056) | -0.126     | 6152      | -1.607             | 5.40E-02             |
|                  | Symptom         | DepAll            | 19804<br>(0.261)                | 0.306<br>(0.044) | 33136<br>(0.256)               | 0.188<br>(0.027) | -0.118     | 19841     | -1.055             | 1.46E-01             |

|              |            |                  |                  |                   |                  |        |        |        |          |
|--------------|------------|------------------|------------------|-------------------|------------------|--------|--------|--------|----------|
| Self-report  | SelfRepDep | 59341<br>(0.078) | 0.132<br>(0.027) | 115285<br>(0.077) | 0.126<br>(0.014) | -0.006 | 70255  | -1.419 | 7.79E-02 |
| Help-seeking | GPpsy      | 79630<br>(0.332) | 0.145<br>(0.013) | 144159<br>(0.353) | 0.144<br>(0.009) | -0.001 | 128193 | -0.890 | 1.87E-01 |
| Help-seeking | Psypsy     | 79791<br>(0.100) | 0.153<br>(0.024) | 144659<br>(0.114) | NA<br>(NA)       | NA     | 135520 | -0.997 | 1.59E-01 |
| No-MDD       | GPNoDep    | 14570<br>(0.140) | 0.372<br>(0.117) | 24492<br>(0.164)  | 0.122<br>(0.043) | -0.251 | 14865  | -1.277 | 1.01E-01 |

**Supplemental Table S9: Heritability of definitions of MDD stratified by risk factors**

This table shows the heritability estimates of each definition of MDD calculated using PCGCs in subgroups stratified by risk factors (age, deprivation, trauma, neuroticism, sex and education). For each stratum, we show the number of samples (N\_sample), case prevalence (prev), heritability estimate (h2) and its standard error (se). We show the difference between heritabilities from the two strata per risk factor ( $\Delta h^2$ ), and calculate the degree of freedom (df), t-test statistic (t-test\_stat), and significance of this difference (t-test\_pvalue) using both heritability estimates, standard errors and sample sizes. None of the differences are significant in a two-tailed t-test at  $p < 0.05$  after multiple testing correction.

| CHR | SNP        | BP        | A1 | A0 | A1FREQ | NMISS  | OR     | SE    | P        | MHC/SV |
|-----|------------|-----------|----|----|--------|--------|--------|-------|----------|--------|
| 1   | rs1324481  | 33892964  | T  | G  | 0.317  | 333782 | 0.9708 | 0.005 | 4.01E-08 |        |
| 1   | rs1697593  | 190453672 | T  | C  | 0.483  | 332979 | 1.028  | 0.005 | 3.70E-08 |        |
| 1   | rs10863714 | 208710593 | A  | G  | 0.4238 | 335411 | 1.029  | 0.005 | 2.59E-08 |        |
| 2   | rs1004787  | 45159091  | G  | A  | 0.4694 | 329067 | 0.9677 | 0.005 | 8.80E-11 |        |
| 2   | rs4671381  | 60496910  | T  | C  | 0.4366 | 334992 | 0.9728 | 0.005 | 4.77E-08 |        |
| 2   | rs67716713 | 104267572 | A  | C  | 0.4866 | 334796 | 0.9676 | 0.005 | 4.85E-11 |        |
| 2   | rs1427499  | 145400317 | A  | G  | 0.289  | 336066 | 1.043  | 0.006 | 1.67E-14 |        |
| 3   | rs11711099 | 25225163  | C  | T  | 0.4839 | 330036 | 1.029  | 0.005 | 1.75E-08 |        |
| 3   | rs591988   | 61847695  | T  | C  | 0.2663 | 334385 | 1.032  | 0.006 | 4.25E-08 |        |
| 3   | rs73121433 | 83154013  | A  | G  | 0.1632 | 328418 | 1.039  | 0.007 | 2.01E-08 |        |
| 3   | rs12714592 | 84387950  | C  | A  | 0.2734 | 335552 | 1.038  | 0.006 | 4.85E-11 | SV     |
| 3   | rs62250491 | 85616009  | G  | T  | 0.3713 | 333650 | 1.042  | 0.005 | 2.02E-15 | SV     |
| 3   | rs1995245  | 117776020 | C  | T  | 0.1497 | 333233 | 0.959  | 0.007 | 2.45E-09 |        |
| 4   | rs899632   | 57749347  | C  | T  | 0.3867 | 332773 | 0.9702 | 0.005 | 4.86E-09 |        |
| 5   | rs1549212  | 166996722 | C  | T  | 0.3744 | 333822 | 1.032  | 0.005 | 2.22E-09 |        |
| 6   | rs2892512  | 98744946  | C  | T  | 0.2684 | 334016 | 1.033  | 0.006 | 7.58E-09 |        |
| 6   | rs465646   | 111620758 | G  | A  | 0.1588 | 334411 | 1.055  | 0.007 | 7.74E-15 |        |
| 7   | rs13237637 | 3503207   | C  | G  | 0.4967 | 331983 | 0.9718 | 0.005 | 1.41E-08 |        |
| 7   | rs1174864  | 53127559  | G  | A  | 0.4483 | 334045 | 0.9726 | 0.005 | 3.68E-08 |        |
| 7   | rs2404324  | 99023461  | G  | A  | 0.1547 | 335670 | 0.9627 | 0.007 | 3.57E-08 |        |
| 7   | rs10244364 | 117529641 | C  | T  | 0.3201 | 330304 | 1.039  | 0.005 | 1.03E-12 |        |
| 8   | rs13258512 | 92777433  | G  | A  | 0.4221 | 331316 | 0.9709 | 0.005 | 6.40E-09 |        |
| 9   | rs56209921 | 38276428  | T  | C  | 0.163  | 335889 | 1.039  | 0.007 | 1.42E-08 |        |
| 9   | rs323740   | 102083530 | G  | C  | 0.4737 | 335303 | 0.9706 | 0.005 | 2.80E-09 |        |
| 9   | rs7870475  | 128134034 | C  | T  | 0.4743 | 334109 | 1.032  | 0.005 | 6.28E-10 |        |
| 10  | rs12244388 | 104640052 | A  | G  | 0.3357 | 335056 | 1.036  | 0.005 | 1.91E-11 |        |
| 11  | rs4756044  | 45961114  | C  | A  | 0.2525 | 334624 | 0.9689 | 0.006 | 4.10E-08 | SV     |
| 11  | rs10896972 | 59212884  | G  | T  | 0.3302 | 336010 | 0.9687 | 0.005 | 2.30E-09 |        |

|    |            |           |   |   |        |        |        |       |          |    |
|----|------------|-----------|---|---|--------|--------|--------|-------|----------|----|
| 11 | rs2155290  | 112851068 | G | C | 0.3826 | 335943 | 1.067  | 0.005 | 9.47E-36 |    |
| 12 | rs4766578  | 111904371 | T | A | 0.4958 | 335926 | 1.028  | 0.005 | 3.62E-08 | SV |
| 13 | rs56081685 | 59454140  | G | T | 0.314  | 335337 | 0.9704 | 0.005 | 2.76E-08 |    |
| 13 | rs837333   | 101179012 | C | T | 0.4763 | 326768 | 1.029  | 0.005 | 1.34E-08 |    |
| 15 | rs150294   | 89931148  | G | A | 0.3996 | 329261 | 0.9701 | 0.005 | 4.04E-09 |    |
| 17 | rs7216173  | 51891405  | A | T | 0.2139 | 323640 | 1.036  | 0.006 | 1.13E-08 |    |
| 18 | rs1221983  | 49993266  | T | G | 0.394  | 335304 | 1.029  | 0.005 | 1.63E-08 |    |

### Supplemental Table S10: Genome-wide significant loci in GWAS for smoking

This table shows the genome-wide significant loci (top SNP in 1MB regions) in GWAS for smoking (data field 20160: “Ever smoked”). For each of the locus, we show the chromosome (CHR), rsid for the top SNP in 1MB window (SNP), position on the chromosome (BP), test and minor allele (A1), major allele (A0), allele frequency of the test allele (A1FREQ) in all White-British samples in UKBiobank, number of samples included in the logistic regression at the locus with no missing genotype, phenotype or covariate data (NMISS), odds ratio of the minor allele on the phenotype (OR), standard error of the OR (SE), p value of the association (P), and whether the locus is in the MHC region on chr6:25-35MB or in any SV regions as listed in Price et al 2008<sup>5</sup> (MHC/SV).



| CHR | SNP        | BP        | A1 | A0 | A1FREQ | NMISS  | BETA     | SE       | P        | MHC/SV |
|-----|------------|-----------|----|----|--------|--------|----------|----------|----------|--------|
| 1   | rs1002656  | 37192741  | C  | T  | 0.2905 | 270132 | 0.01183  | 0.001924 | 7.84E-10 |        |
| 1   | rs4561025  | 91263757  | A  | C  | 0.3521 | 273426 | 0.01059  | 0.001912 | 3.04E-08 |        |
| 1   | rs12145171 | 171843249 | C  | A  | 0.4283 | 273985 | -0.01105 | 0.00191  | 7.22E-09 |        |
| 2   | rs12466146 | 16077199  | T  | C  | 0.4219 | 271236 | 0.01055  | 0.00192  | 3.88E-08 |        |
| 2   | rs6743916  | 58704449  | A  | G  | 0.2927 | 271257 | -0.01136 | 0.001921 | 3.34E-09 |        |
| 2   | rs2042555  | 148555489 | A  | G  | 0.418  | 273328 | 0.01323  | 0.001914 | 4.77E-12 |        |
| 2   | rs7567451  | 157053380 | G  | T  | 0.2672 | 272984 | -0.01054 | 0.001915 | 3.67E-08 |        |
| 2   | rs10497655 | 185462041 | C  | T  | 0.3206 | 274114 | -0.0106  | 0.001909 | 2.84E-08 | SV     |
| 3   | rs2278609  | 16924440  | C  | T  | 0.216  | 270342 | 0.01191  | 0.001923 | 5.86E-10 |        |
| 3   | rs1542212  | 35683935  | G  | T  | 0.3917 | 271082 | 0.01205  | 0.001921 | 3.54E-10 |        |
| 3   | rs57838764 | 50374568  | C  | T  | 0.1142 | 273935 | 0.01062  | 0.001911 | 2.75E-08 |        |
| 3   | rs836927   | 107201428 | A  | C  | 0.4257 | 265524 | 0.01067  | 0.001941 | 3.88E-08 |        |
| 3   | rs10935184 | 136153468 | C  | T  | 0.4093 | 274114 | -0.01165 | 0.00191  | 1.06E-09 |        |
| 4   | rs13102162 | 90939567  | G  | A  | 0.3591 | 264987 | -0.01124 | 0.001942 | 7.15E-09 |        |
| 4   | rs10032297 | 139013401 | A  | T  | 0.3958 | 269788 | -0.01136 | 0.001925 | 3.54E-09 |        |
| 4   | rs7696796  | 183166469 | A  | G  | 0.2464 | 274114 | 0.01116  | 0.00191  | 5.05E-09 |        |
| 5   | rs4413518  | 107738001 | A  | G  | 0.2189 | 271136 | 0.01234  | 0.00192  | 1.29E-10 |        |
| 6   | rs2148254  | 11994762  | G  | A  | 0.4928 | 270744 | -0.01133 | 0.001921 | 3.67E-09 |        |
| 6   | rs7772160  | 27412386  | C  | T  | 0.4783 | 274114 | -0.01061 | 0.00191  | 2.72E-08 | MHC    |
| 6   | rs2269426  | 32076499  | A  | G  | 0.3594 | 274114 | 0.01334  | 0.001911 | 2.95E-12 | MHC    |
| 6   | rs6916891  | 98457595  | T  | G  | 0.1176 | 271957 | 0.01064  | 0.001917 | 2.89E-08 |        |
| 7   | rs56226325 | 2078981   | T  | C  | 0.1534 | 274114 | -0.01052 | 0.00191  | 3.61E-08 |        |
| 7   | rs11509880 | 12261911  | A  | G  | 0.3278 | 273194 | 0.01211  | 0.001913 | 2.43E-10 |        |
| 7   | rs73167875 | 82939096  | A  | T  | 0.2022 | 269308 | -0.01083 | 0.001926 | 1.90E-08 |        |
| 7   | rs274632   | 86269181  | A  | C  | 0.4229 | 273225 | -0.01153 | 0.001915 | 1.71E-09 |        |
| 7   | rs6976111  | 117495667 | A  | C  | 0.2993 | 264510 | 0.01101  | 0.001943 | 1.45E-08 |        |
| 7   | rs13226841 | 126389408 | C  | T  | 0.4896 | 274064 | 0.0125   | 0.00191  | 6.03E-11 |        |
| 8   | rs7845515  | 4946228   | A  | G  | 0.2875 | 265208 | 0.01267  | 0.001941 | 6.69E-11 |        |

|    |            |           |   |   |        |        |          |          |          |    |
|----|------------|-----------|---|---|--------|--------|----------|----------|----------|----|
| 8  | rs2921036  | 8363897   | T | C | 0.4898 | 269177 | 0.01775  | 0.001927 | 3.32E-20 | SV |
| 8  | rs477860   | 9811765   | T | C | 0.2968 | 271822 | -0.01439 | 0.001918 | 6.25E-14 | SV |
| 8  | rs11250117 | 10972740  | A | C | 0.4667 | 272432 | 0.0172   | 0.001915 | 2.69E-19 | SV |
| 9  | rs2380937  | 4145781   | C | T | 0.4011 | 272440 | -0.01119 | 0.001916 | 5.23E-09 |    |
| 9  | rs4977844  | 23295899  | C | G | 0.3598 | 266189 | 0.01136  | 0.001937 | 4.48E-09 |    |
| 9  | rs7869969  | 96217447  | G | A | 0.3321 | 274057 | -0.01087 | 0.00191  | 1.28E-08 |    |
| 9  | rs28377268 | 98225056  | T | G | 0.1071 | 272736 | 0.01142  | 0.001914 | 2.42E-09 |    |
| 9  | rs2094580  | 120490857 | G | T | 0.2825 | 270567 | 0.01071  | 0.001922 | 2.50E-08 |    |
| 11 | rs34796300 | 13315205  | T | C | 0.4254 | 272562 | 0.01137  | 0.001916 | 2.96E-09 |    |
| 11 | rs297343   | 16354653  | T | G | 0.3604 | 272965 | 0.01107  | 0.001914 | 7.23E-09 |    |
| 11 | rs2071754  | 31812582  | C | T | 0.201  | 274114 | 0.01262  | 0.00191  | 3.94E-11 |    |
| 11 | rs7107356  | 47676170  | A | G | 0.4943 | 273602 | -0.01319 | 0.001911 | 5.21E-12 | SV |
| 11 | rs10896636 | 57448032  | G | C | 0.3449 | 268952 | 0.01281  | 0.001928 | 3.02E-11 |    |
| 11 | rs674437   | 88689953  | G | A | 0.4843 | 273301 | 0.01098  | 0.001913 | 9.46E-09 | SV |
| 11 | rs35738585 | 113386347 | G | T | 0.4334 | 271900 | -0.01561 | 0.001918 | 3.95E-16 |    |
| 12 | rs11608355 | 109879292 | C | T | 0.3132 | 272760 | 0.01181  | 0.001914 | 6.75E-10 | SV |
| 12 | rs3741475  | 117669914 | A | G | 0.1944 | 273597 | 0.01194  | 0.001911 | 4.14E-10 |    |
| 13 | rs2210903  | 69576975  | G | A | 0.3692 | 274114 | -0.01168 | 0.00191  | 9.64E-10 |    |
| 14 | rs4140799  | 72170969  | G | A | 0.47   | 272113 | 0.01268  | 0.001917 | 3.68E-11 |    |
| 14 | rs10144845 | 75237770  | C | T | 0.317  | 274031 | -0.01389 | 0.001911 | 3.60E-13 |    |
| 15 | rs12903563 | 78033735  | T | C | 0.4798 | 269275 | 0.01176  | 0.001927 | 1.03E-09 |    |
| 17 | rs12938775 | 2574821   | G | A | 0.4989 | 274114 | 0.0114   | 0.00191  | 2.36E-09 |    |
| 17 | rs35982947 | 38214275  | C | A | 0.3692 | 267464 | -0.01109 | 0.001933 | 9.51E-09 |    |
| 17 | rs62062288 | 44096553  | A | G | 0.2181 | 267423 | 0.01863  | 0.001937 | 6.72E-22 |    |
| 17 | rs56084168 | 79084574  | T | C | 0.1478 | 273326 | -0.0123  | 0.001913 | 1.27E-10 |    |
| 18 | rs9952522  | 31286129  | C | T | 0.4084 | 272613 | -0.01074 | 0.001915 | 2.04E-08 |    |
| 18 | rs11665070 | 35152563  | G | A | 0.3313 | 272412 | 0.01565  | 0.001916 | 3.10E-16 |    |
| 18 | rs8097041  | 50898217  | A | T | 0.3644 | 273465 | -0.01159 | 0.001953 | 2.95E-09 |    |
| 18 | rs56403421 | 52765283  | C | A | 0.3309 | 268579 | 0.01207  | 0.001931 | 4.15E-10 |    |

|    |            |          |   |   |        |        |         |          |          |
|----|------------|----------|---|---|--------|--------|---------|----------|----------|
| 22 | rs1028321  | 39926929 | A | G | 0.3052 | 272405 | -0.0111 | 0.001918 | 7.09E-09 |
| 22 | rs11090045 | 41753603 | A | G | 0.3031 | 263768 | 0.01321 | 0.001945 | 1.13E-11 |

**Supplemental Table S11: Genome-wide significant loci in GWAS for neuroticism**

This table shows the genome-wide significant loci (top SNP in 1MB regions) in GWAS for neuroticism score (data field 20127: “Neuroticism score”). For each of the locus, we show the chromosome (CHR), rsid for the top SNP in 1MB window (SNP), position on the chromosome (BP), test and minor allele (A1), major allele (A0), allele frequency of the test allele (A1FREQ) in all White-British samples in UKBiobank, number of samples included in the linear regression at the locus with no missing genotype, phenotype or covariate data (NMISS), standardized effect size of the minor allele on the phenotype (BETA), standard error of the effect (SE), p value of the association (P), and whether the locus is in the MHC region on chr6:25-35MB or in any SV regions as listed in Price et al 2008<sup>5</sup> (MHC/SV).

| CONDITION   | CATEGORY     | DEFINITION  | LDSC      |               |               |          | rho-HESS      |               |
|-------------|--------------|-------------|-----------|---------------|---------------|----------|---------------|---------------|
|             |              |             | INTERCEPT | RHO (SE)      | RG (SE)       | P        | RHO (SE)      | RG (SE)       |
| <b>ADHD</b> | DSM-based    | LifetimeMDD | 0.022     | 0.048 (0.011) | 0.297 (0.076) | 8.93E-05 | 0.054 (0.016) | 0.271 (0.026) |
|             | Help-seeking | GPpsy       | 0.026     | 0.058 (0.007) | 0.389 (0.045) | 5.47E-18 | 0.043 (0.008) | 0.272 (0.016) |
|             | Symptom      | DepAll      | 0.026     | 0.038 (0.011) | 0.280 (0.081) | 5.00E-04 | 0.044 (0.015) | 0.263 (0.029) |
|             | Self-report  | SelfRepDep  | 0.017     | 0.017 (0.006) | 0.227 (0.077) | 3.20E-03 | 0.020 (0.009) | 0.217 (0.030) |
|             | No-MDD       | GPNoDep     | 0.008     | 0.027 (0.010) | 0.307 (0.224) | 1.71E-01 | 0.022 (0.019) | 0.206 (0.053) |
| <b>BIP</b>  | DSM-based    | LifetimeMDD | 0.019     | 0.043 (0.013) | 0.344 (0.095) | 3.00E-04 | 0.038 (0.012) | 0.286 (0.035) |
|             | Help-seeking | GPpsy       | 0.026     | 0.033 (0.006) | 0.320 (0.052) | 5.19E-10 | 0.028 (0.006) | 0.264 (0.021) |
|             | Symptom      | DepAll      | 0.001     | 0.052 (0.009) | 0.534 (0.091) | 4.66E-09 | 0.034 (0.011) | 0.290 (0.036) |
|             | Self-report  | SelfRepDep  | 0.021     | 0.020 (0.005) | 0.341 (0.088) | 1.00E-04 | 0.019 (0.007) | 0.291 (0.037) |
|             | No-MDD       | GPNoDep     | 0.003     | 0.021 (0.011) | 0.305 (0.155) | 4.87E-02 | 0.011 (0.014) | 0.163 (0.070) |
| <b>SCZ</b>  | DSM-based    | LifetimeMDD | 0.023     | 0.061 (0.010) | 0.372 (0.055) | 1.38E-11 | 0.059 (0.008) | 0.247 (0.017) |
|             | Help-seeking | GPpsy       | 0.028     | 0.046 (0.007) | 0.326 (0.037) | 5.01E-19 | 0.038 (0.004) | 0.197 (0.010) |
|             | Symptom      | DepAll      | 0.010     | 0.056 (0.009) | 0.421 (0.053) | 2.08E-15 | 0.041 (0.007) | 0.201 (0.017) |
|             | Self-report  | SelfRepDep  | 0.019     | 0.028 (0.005) | 0.357 (0.059) | 1.11E-09 | 0.025 (0.004) | 0.226 (0.018) |
|             | No-MDD       | GPNoDep     | 0.006     | 0.031 (0.010) | 0.351 (0.111) | 1.60E-03 | 0.024 (0.009) | 0.203 (0.035) |
| <b>AUT</b>  | DSM-based    | LifetimeMDD | 0.010     | 0.030 (0.016) | 0.164 (0.090) | 6.66E-02 | 0.039 (0.040) | 0.295 (0.077) |
|             | Help-seeking | GPpsy       | 0.014     | 0.005 (0.009) | 0.033 (0.057) | 5.56E-01 | 0.016 (0.019) | 0.147 (0.047) |
|             | Symptom      | DepAll      | -0.002    | 0.041 (0.014) | 0.272 (0.100) | 6.30E-03 | 0.017 (0.039) | 0.146 (0.080) |
|             | Self-report  | SelfRepDep  | 0.007     | 0.009 (0.009) | 0.098 (0.096) | 3.06E-01 | 0.014 (0.023) | 0.227 (0.084) |

|                             |              |             |        |                |                |           |               |               |
|-----------------------------|--------------|-------------|--------|----------------|----------------|-----------|---------------|---------------|
|                             | No-MDD       | GPNoDep     | 0.011  | -0.023 (0.017) | -0.225 (0.175) | 1.98E-01  | 0.009 (0.048) | 0.146 (0.168) |
| <b>PGC1 (MDD)</b>           | DSM-based    | LifetimeMDD | 0.008  | 0.107 (0.013)  | 0.857 (0.127)  | 1.51E-11  | 0.076 (0.039) | 0.796 (0.099) |
|                             | Help-seeking | GPpsy       | 0.013  | 0.103 (0.008)  | 0.940 (0.100)  | 6.52E-21  | 0.077 (0.018) | 0.996 (0.073) |
|                             | Symptom      | DepAll      | 0.003  | 0.103 (0.012)  | 0.968 (0.130)  | 1.12E-13  | 0.069 (0.037) | 0.856 (0.104) |
|                             | Self-report  | SelfRepDep  | 0.016  | 0.050 (0.008)  | 0.811 (0.124)  | 6.27E-11  | 0.048 (0.022) | 1.110 (0.117) |
|                             | No-MDD       | GPNoDep     | -0.003 | 0.073 (0.013)  | 1.058 (0.265)  | 6.46E-05  | 0.040 (0.046) | 0.809 (0.198) |
| <b>23andMe (depression)</b> | DSM-based    | LifetimeMDD | 0.020  | 0.066 (0.006)  | 0.826 (0.060)  | 6.41E-43  | 0.049 (0.010) | 0.512 (0.025) |
|                             | Help-seeking | GPpsy       | 0.045  | 0.057 (0.003)  | 0.853 (0.030)  | 8.74E-179 | 0.044 (0.004) | 0.571 (0.015) |
|                             | Symptom      | DepAll      | 0.028  | 0.048 (0.005)  | 0.732 (0.064)  | 3.53E-30  | 0.041 (0.009) | 0.503 (0.028) |
|                             | Self-report  | SelfRepDep  | 0.030  | 0.028 (0.002)  | 0.735 (0.062)  | 2.24E-32  | 0.025 (0.005) | 0.568 (0.032) |
|                             | No-MDD       | GPNoDep     | 0.015  | 0.031 (0.005)  | 0.680 (0.141)  | 1.42E-06  | 0.026 (0.011) | 0.533 (0.059) |
| <b>neuroticism</b>          | DSM-based    | LifetimeMDD | 0.179  | 0.080 (0.007)  | 0.671 (0.041)  | 2.69E-60  | 0.156 (0.009) | 1.150 (0.025) |
|                             | Help-seeking | GPpsy       | 0.384  | 0.072 (0.005)  | 0.705 (0.019)  | 1.88E-298 | 0.147 (0.004) | 1.350 (0.015) |
|                             | Symptom      | DepAll      | 0.161  | 0.063 (0.007)  | 0.617 (0.043)  | 2.22E-46  | 0.126 (0.009) | 1.090 (0.028) |
|                             | Self-report  | SelfRepDep  | 0.231  | 0.041 (0.004)  | 0.717 (0.040)  | 2.48E-71  | 0.096 (0.005) | 1.570 (0.053) |
|                             | No-MDD       | GPNoDep     | 0.109  | 0.046 (0.007)  | 0.642 (0.128)  | 5.69E-07  | 0.099 (0.011) | 1.370 (0.092) |
| <b>smoking</b>              | DSM-based    | LifetimeMDD | 0.037  | 0.019 (0.006)  | 0.192 (0.055)  | 5.00E-04  | 0.030 (0.009) | 0.283 (0.022) |
|                             | Help-seeking | GPpsy       | 0.071  | 0.023 (0.004)  | 0.279 (0.037)  | 3.95E-14  | 0.031 (0.004) | 0.365 (0.014) |
|                             | Symptom      | DepAll      | 0.040  | 0.023 (0.005)  | 0.286 (0.057)  | 5.79E-07  | 0.031 (0.009) | 0.348 (0.025) |
|                             | Self-report  | SelfRepDep  | 0.022  | 0.008 (0.003)  | 0.182 (0.052)  | 5.00E-04  | 0.012 (0.005) | 0.246 (0.026) |
|                             | No-MDD       | GPNoDep     | 0.012  | 0.015 (0.007)  | 0.262 (0.100)  | 8.80E-03  | 0.015 (0.011) | 0.274 (0.045) |

**Supplemental Table S12: Genetic correlation between definitions of MDD and other conditions**

This table shows the genetic correlation between each definition of MDD in UKBiobank with other conditions: attention deficit hyperactive disorder (ADHD), bipolar disorder (BIP), schizophrenia (SCZ), autism (AUT), first meta-analysis of MDD by PGC (PGC1), minimal phenotyping based MDD study by 23andMe (23andMe), and neuroticism and smoking in UKBiobank. This table shows results from two different methods: LDSC and rho-HESS. For each of the methods we show the genetic covariance ( $\rho$ ) and its standard error ( $\rho_{se}$ ), as well as the genetic correlation ( $r_G$ ) and its standard error ( $r_{G_{se}}$ ); genetic correlation is genetic covariance divided by the product of the heritabilities of the pair of traits involved. For estimates from LDSC, we show the p value (P) for the genetic correlation being different from 0. For estimates from rho-HESS, both genetic covariance and genetic correlation are summed from regional genetic covariance and genetic correlations in 1703 independent genomic regions (Supplemental Methods). Correlation coefficient is high between genetic correlation estimated from both methods ( $r=0.71$ ).

| CATEGORY     | PHENO       | NSAMPLES | CHR | SNP        | BP        | A1 | A0 | A1FREQ | OR    | SE    | P        | MHC/SV |
|--------------|-------------|----------|-----|------------|-----------|----|----|--------|-------|-------|----------|--------|
| DSM-MDD      | LifetimeMDD | 67171    | 6   | rs926552   | 29548089  | A  | G  | 0.140  | 0.903 | 0.019 | 4.46E-08 | MHC    |
| Help-seeking | GPpsy       | 323344   | 1   | rs6699744  | 72825144  | A  | T  | 0.388  | 0.960 | 0.005 | 6.55E-14 |        |
| Help-seeking | GPpsy       | 332112   | 1   | rs6697602  | 177039372 | G  | C  | 0.083  | 1.056 | 0.009 | 6.36E-09 |        |
| Help-seeking | GPpsy       | 331205   | 2   | rs11123030 | 124976163 | T  | C  | 0.491  | 1.032 | 0.005 | 1.13E-09 |        |
| Help-seeking | GPpsy       | 326346   | 3   | rs66511648 | 117515519 | C  | T  | 0.284  | 1.033 | 0.006 | 2.42E-08 |        |
| Help-seeking | GPpsy       | 329391   | 5   | rs30266    | 103972357 | A  | G  | 0.328  | 1.039 | 0.006 | 3.50E-12 |        |
| Help-seeking | GPpsy       | 331857   | 6   | rs12205083 | 24275483  | G  | A  | 0.104  | 1.053 | 0.008 | 6.24E-10 |        |
| Help-seeking | GPpsy       | 332546   | 6   | rs75782365 | 26408551  | G  | T  | 0.110  | 0.951 | 0.008 | 1.36E-09 | MHC    |
| Help-seeking | GPpsy       | 332629   | 6   | rs7772160  | 27412386  | C  | T  | 0.478  | 0.965 | 0.005 | 3.27E-12 | MHC    |
| Help-seeking | GPpsy       | 332629   | 6   | rs3135296  | 28795856  | T  | A  | 0.120  | 0.946 | 0.008 | 3.75E-12 | MHC    |
| Help-seeking | GPpsy       | 326902   | 6   | rs3115631  | 29986324  | A  | T  | 0.126  | 0.944 | 0.008 | 2.86E-13 | MHC    |
| Help-seeking | GPpsy       | 332629   | 6   | rs1625792  | 31306420  | A  | G  | 0.147  | 0.961 | 0.007 | 4.59E-08 | MHC    |
| Help-seeking | GPpsy       | 327948   | 6   | rs236346   | 36832103  | C  | T  | 0.095  | 0.950 | 0.009 | 1.19E-08 | MHC    |
| Help-seeking | GPpsy       | 331741   | 6   | rs9345737  | 66676938  | G  | A  | 0.439  | 0.969 | 0.005 | 3.03E-09 |        |
| Help-seeking | GPpsy       | 332629   | 7   | rs3807866  | 12250378  | A  | G  | 0.410  | 1.039 | 0.005 | 5.44E-13 |        |
| Help-seeking | GPpsy       | 327847   | 9   | rs393488   | 17044971  | A  | T  | 0.469  | 0.967 | 0.005 | 2.14E-10 |        |
| Help-seeking | GPpsy       | 331280   | 9   | rs12057031 | 25235063  | T  | C  | 0.108  | 0.952 | 0.008 | 5.29E-09 |        |
| Help-seeking | GPpsy       | 322805   | 10  | rs11599236 | 106454672 | C  | T  | 0.408  | 0.971 | 0.005 | 2.91E-08 |        |
| Help-seeking | GPpsy       | 332122   | 11  | rs537635   | 88705235  | T  | C  | 0.484  | 1.033 | 0.005 | 6.24E-10 | SV     |
| Help-seeking | GPpsy       | 329151   | 11  | rs578174   | 89959637  | G  | A  | 0.102  | 0.953 | 0.009 | 2.10E-08 | SV     |

|              |         |        |    |            |           |   |   |       |       |       |          |     |
|--------------|---------|--------|----|------------|-----------|---|---|-------|-------|-------|----------|-----|
| Help-seeking | GPpsy   | 332489 | 14 | rs12889665 | 75234830  | T | G | 0.462 | 0.972 | 0.005 | 3.16E-08 |     |
| Help-seeking | GPpsy   | 329763 | 14 | rs61997596 | 104511206 | A | G | 0.191 | 1.037 | 0.007 | 4.15E-08 |     |
| Help-seeking | GPpsy   | 332629 | 16 | rs11646401 | 21609978  | G | C | 0.442 | 1.029 | 0.005 | 3.58E-08 |     |
| Help-seeking | GPpsy   | 327186 | 18 | rs12967855 | 35138245  | A | G | 0.329 | 1.034 | 0.006 | 1.57E-09 |     |
| Help-seeking | GPpsy   | 331002 | 18 | rs8097498  | 53449667  | G | A | 0.387 | 1.031 | 0.005 | 9.58E-09 |     |
| Help-seeking | Psypsy  | 332603 | 6  | rs66975207 | 26942146  | C | A | 0.111 | 0.925 | 0.013 | 1.23E-09 | MHC |
| Help-seeking | Psypsy  | 333419 | 6  | rs4713145  | 28106827  | C | T | 0.244 | 0.941 | 0.009 | 5.32E-11 | MHC |
| Help-seeking | Psypsy  | 333295 | 6  | rs3129120  | 29111775  | C | T | 0.124 | 0.925 | 0.012 | 1.45E-10 | MHC |
| Help-seeking | Psypsy  | 333387 | 6  | rs2517622  | 30155149  | C | G | 0.137 | 0.926 | 0.012 | 4.20E-11 | MHC |
| Help-seeking | Psypsy  | 319776 | 6  | rs535777   | 32577633  | C | G | 0.138 | 0.930 | 0.012 | 9.94E-10 | MHC |
| No-MDD       | GPNoDep | 57572  | 6  | rs3094146  | 29970960  | C | G | 0.130 | 0.870 | 0.025 | 4.74E-08 | MHC |

### Supplemental Table S13: Genome-wide significant loci in GWAS for definitions of MDD

This table shows the genome-wide significant loci (top SNP in 1MB regions) in GWAS for all definitions of MDD in UKBiobank. Only four definitions show genome-wide significant hits: DSM-based LifetimeMDD, minimal phenotyping, help-seeking based definitions GPpsy and Psypsy, and minimal phenotyping, help-seeking based no-MDD definition that exclude MDD symptoms GPNoDep. For each of the locus, we show the chromosome (CHR), rsid for the top SNP in 1MB window (SNP), position on the chromosome (BP), test and minor allele (A1), major allele (A0), allele frequency of the test allele (A1FREQ) in all White-British samples in UKBiobank, number of samples included in the linear regression at the locus with no missing genotype, phenotype or covariate data (NMISS), standardized effect size of the minor allele on the phenotype (BETA), standard error of the effect (SE), p value of the association (P), and whether the locus is in the MHC region on chr6:25-35MB or in any SV regions as listed in Price et al 2008<sup>5</sup> (MHC/SV). We note that rs3094146 in GPNoDep lies in the same locus as rs3115631 in GPpsy, and they lie in the same MB region as rs926552 in LifetimeMDD and rs3129120 in Psypsy, with GPNoDep showing the greatest size of effect (OR=0.84, SE=0.025) demonstrating this locus is not specific to MDD but shared and potentially driven by conditions other than MDD captured by GPNoDep.



| CATEGORY            | PHENOTYPE          | SNP        | CHR | BP        | A1    | OR    | L95      | U95        | P        | REPLICATION   |
|---------------------|--------------------|------------|-----|-----------|-------|-------|----------|------------|----------|---------------|
| <b>Help seeking</b> | <b>GPpsy</b>       | rs6699744  | 1   | 72825144  | A     | 0.960 | 0.950    | 0.971      | 6.55E-14 | Replicated    |
|                     |                    | rs6697602  | 1   | 177039372 | G     | 1.056 | 1.037    | 1.075      | 6.36E-09 | Replicated    |
|                     |                    | rs11123030 | 2   | 124976163 | T     | 1.032 | 1.022    | 1.043      | 1.13E-09 | Replicated    |
|                     |                    | rs66511648 | 3   | 117515519 | C     | 1.033 | 1.021    | 1.045      | 2.42E-08 | Replicated    |
|                     |                    | rs30266    | 5   | 103972357 | A     | 1.039 | 1.028    | 1.050      | 3.50E-12 | Replicated    |
|                     |                    | rs12205083 | 6   | 24275483  | G     | 1.053 | 1.036    | 1.071      | 6.24E-10 | Replicated    |
|                     |                    | rs75782365 | 6   | 26408551  | G     | 0.951 | 0.936    | 0.967      | 1.36E-09 | Replicated    |
|                     |                    | rs7772160  | 6   | 27412386  | C     | 0.965 | 0.955    | 0.974      | 3.27E-12 | Replicated    |
|                     |                    | rs4713145  | 6   | 28106827  | C     | 0.969 | 0.957    | 0.980      | 1.51E-07 | Replicated    |
|                     |                    | rs3135296  | 6   | 28795856  | T     | 0.946 | 0.931    | 0.961      | 3.75E-12 | Replicated    |
|                     |                    | rs3129120  | 6   | 29111775  | C     | 0.948 | 0.934    | 0.963      | 1.48E-11 | Replicated    |
|                     |                    | rs3115631  | 6   | 29986324  | A     | 0.944 | 0.929    | 0.959      | 2.86E-13 | Replicated    |
|                     |                    | rs2517622  | 6   | 30155149  | C     | 0.950 | 0.936    | 0.964      | 1.26E-11 | Replicated    |
|                     |                    | rs1625792  | 6   | 31306420  | A     | 0.961 | 0.947    | 0.975      | 4.59E-08 | Replicated    |
|                     |                    | rs535777   | 6   | 32577633  | C     | 0.965 | 0.951    | 0.980      | 4.66E-06 | Replicated    |
|                     |                    | rs236346   | 6   | 36832103  | C     | 0.950 | 0.934    | 0.967      | 1.19E-08 | Replicated    |
|                     |                    | rs9345737  | 6   | 66676938  | G     | 0.969 | 0.960    | 0.979      | 3.03E-09 | Replicated    |
|                     |                    | rs3807866  | 7   | 12250378  | A     | 1.039 | 1.028    | 1.049      | 5.44E-13 | Replicated    |
|                     |                    | rs393488   | 9   | 17044971  | A     | 0.967 | 0.958    | 0.977      | 2.14E-10 | Replicated    |
|                     |                    | rs12057031 | 9   | 25235063  | T     | 0.952 | 0.936    | 0.968      | 5.29E-09 | Replicated    |
| rs11599236          | 10                 | 106454672  | C   | 0.971     | 0.961 | 0.981 | 2.91E-08 | Replicated |          |               |
| rs537635            | 11                 | 88705235   | T   | 1.033     | 1.022 | 1.043 | 6.24E-10 | Replicated |          |               |
| rs578174            | 11                 | 89959637   | G   | 0.953     | 0.937 | 0.969 | 2.10E-08 | Replicated |          |               |
| rs12889665          | 14                 | 75234830   | T   | 0.972     | 0.962 | 0.982 | 3.16E-08 | Replicated |          |               |
| rs61997596          | 14                 | 104511206  | A   | 1.037     | 1.023 | 1.050 | 4.15E-08 | Replicated |          |               |
| rs11646401          | 16                 | 21609978   | G   | 1.029     | 1.019 | 1.040 | 3.58E-08 | Replicated |          |               |
| rs12967855          | 18                 | 35138245   | A   | 1.034     | 1.023 | 1.045 | 1.57E-09 | Replicated |          |               |
| <b>DSM based</b>    | <b>LifetimeMDD</b> | rs6699744  | 1   | 72825144  | A     | 0.984 | 0.959    | 1.010      | 2.20E-01 | NotReplicated |
|                     |                    | rs6697602  | 1   | 177039372 | G     | 1.061 | 1.015    | 1.110      | 9.30E-03 | NotReplicated |
|                     |                    | rs11123030 | 2   | 124976163 | T     | 1.024 | 0.999    | 1.050      | 6.35E-02 | NotReplicated |

|               |                 |            |    |           |   |       |       |       |          |               |
|---------------|-----------------|------------|----|-----------|---|-------|-------|-------|----------|---------------|
|               |                 | rs66511648 | 3  | 117515519 | C | 1.034 | 1.006 | 1.064 | 1.79E-02 | NotReplicated |
|               |                 | rs30266    | 5  | 103972357 | A | 1.047 | 1.020 | 1.076 | 6.55E-04 | Replicated    |
|               |                 | rs12205083 | 6  | 24275483  | G | 0.992 | 0.952 | 1.033 | 6.89E-01 | NotReplicated |
|               |                 | rs75782365 | 6  | 26408551  | G | 0.939 | 0.902 | 0.978 | 2.32E-03 | NotReplicated |
|               |                 | rs7772160  | 6  | 27412386  | C | 0.957 | 0.934 | 0.982 | 6.19E-04 | Replicated    |
|               |                 | rs4713145  | 6  | 28106827  | C | 0.962 | 0.934 | 0.990 | 9.04E-03 | NotReplicated |
|               |                 | rs3135296  | 6  | 28795856  | T | 0.905 | 0.870 | 0.941 | 5.48E-07 | Replicated    |
|               |                 | rs3129120  | 6  | 29111775  | C | 0.905 | 0.871 | 0.941 | 4.08E-07 | Replicated    |
|               |                 | rs3115631  | 6  | 29986324  | A | 0.906 | 0.872 | 0.941 | 4.49E-07 | Replicated    |
|               |                 | rs2517622  | 6  | 30155149  | C | 0.923 | 0.890 | 0.958 | 2.10E-05 | Replicated    |
|               |                 | rs1625792  | 6  | 31306420  | A | 0.939 | 0.906 | 0.973 | 4.91E-04 | Replicated    |
|               |                 | rs535777   | 6  | 32577633  | C | 0.952 | 0.918 | 0.988 | 9.68E-03 | NotReplicated |
|               |                 | rs236346   | 6  | 36832103  | C | 0.955 | 0.915 | 0.997 | 3.65E-02 | NotReplicated |
|               |                 | rs9345737  | 6  | 66676938  | G | 0.994 | 0.970 | 1.020 | 6.63E-01 | NotReplicated |
|               |                 | rs3807866  | 7  | 12250378  | A | 1.049 | 1.023 | 1.076 | 2.33E-04 | Replicated    |
|               |                 | rs393488   | 9  | 17044971  | A | 0.976 | 0.952 | 1.001 | 6.00E-02 | NotReplicated |
|               |                 | rs12057031 | 9  | 25235063  | T | 0.938 | 0.900 | 0.977 | 1.94E-03 | NotReplicated |
|               |                 | rs11599236 | 10 | 106454672 | C | 0.970 | 0.945 | 0.996 | 2.13E-02 | NotReplicated |
|               |                 | rs537635   | 11 | 88705235  | T | 1.041 | 1.016 | 1.068 | 1.44E-03 | Replicated    |
|               |                 | rs578174   | 11 | 89959637  | G | 0.974 | 0.934 | 1.016 | 2.17E-01 | NotReplicated |
|               |                 | rs12889665 | 14 | 75234830  | T | 0.973 | 0.949 | 0.998 | 3.31E-02 | NotReplicated |
|               |                 | rs61997596 | 14 | 104511206 | A | 1.064 | 1.031 | 1.099 | 1.18E-04 | Replicated    |
|               |                 | rs11646401 | 16 | 21609978  | G | 1.019 | 0.994 | 1.045 | 1.37E-01 | NotReplicated |
|               |                 | rs12967855 | 18 | 35138245  | A | 1.001 | 0.975 | 1.029 | 9.23E-01 | NotReplicated |
| <b>No-MDD</b> | <b>GPNNoDep</b> | rs6699744  | 1  | 72825144  | A | 0.972 | 0.940 | 1.006 | 1.02E-01 | NotReplicated |
|               |                 | rs6697602  | 1  | 177039372 | G | 1.073 | 1.013 | 1.136 | 1.61E-02 | NotReplicated |
|               |                 | rs11123030 | 2  | 124976163 | T | 1.019 | 0.986 | 1.052 | 2.63E-01 | NotReplicated |
|               |                 | rs66511648 | 3  | 117515519 | C | 1.016 | 0.979 | 1.053 | 4.02E-01 | NotReplicated |
|               |                 | rs30266    | 5  | 103972357 | A | 1.047 | 1.012 | 1.084 | 8.94E-03 | NotReplicated |
|               |                 | rs12205083 | 6  | 24275483  | G | 1.043 | 0.989 | 1.099 | 1.18E-01 | NotReplicated |
|               |                 | rs75782365 | 6  | 26408551  | G | 0.907 | 0.860 | 0.956 | 2.98E-04 | Replicated    |

|                            |            |            |           |           |       |       |       |          |               |               |
|----------------------------|------------|------------|-----------|-----------|-------|-------|-------|----------|---------------|---------------|
|                            | rs7772160  | 6          | 27412386  | C         | 0.930 | 0.900 | 0.960 | 1.05E-05 | Replicated    |               |
|                            | rs4713145  | 6          | 28106827  | C         | 0.919 | 0.885 | 0.955 | 1.33E-05 | Replicated    |               |
|                            | rs3135296  | 6          | 28795856  | T         | 0.881 | 0.837 | 0.928 | 1.49E-06 | Replicated    |               |
|                            | rs3129120  | 6          | 29111775  | C         | 0.895 | 0.851 | 0.941 | 1.54E-05 | Replicated    |               |
|                            | rs3115631  | 6          | 29986324  | A         | 0.869 | 0.826 | 0.914 | 5.62E-08 | Replicated    |               |
|                            | rs2517622  | 6          | 30155149  | C         | 0.891 | 0.849 | 0.935 | 2.80E-06 | Replicated    |               |
|                            | rs1625792  | 6          | 31306420  | A         | 0.913 | 0.872 | 0.957 | 1.38E-04 | Replicated    |               |
|                            | rs535777   | 6          | 32577633  | C         | 0.926 | 0.882 | 0.973 | 2.15E-03 | NotReplicated |               |
|                            | rs236346   | 6          | 36832103  | C         | 0.990 | 0.937 | 1.046 | 7.21E-01 | NotReplicated |               |
|                            | rs9345737  | 6          | 66676938  | G         | 0.949 | 0.919 | 0.981 | 1.77E-03 | Replicated    |               |
|                            | rs3807866  | 7          | 12250378  | A         | 1.024 | 0.991 | 1.058 | 1.59E-01 | NotReplicated |               |
|                            | rs393488   | 9          | 17044971  | A         | 0.964 | 0.933 | 0.996 | 2.86E-02 | NotReplicated |               |
|                            | rs12057031 | 9          | 25235063  | T         | 0.991 | 0.940 | 1.044 | 7.24E-01 | NotReplicated |               |
|                            | rs11599236 | 10         | 106454672 | C         | 0.985 | 0.953 | 1.019 | 3.82E-01 | NotReplicated |               |
|                            | rs537635   | 11         | 88705235  | T         | 0.999 | 0.967 | 1.031 | 9.33E-01 | NotReplicated |               |
|                            | rs578174   | 11         | 89959637  | G         | 0.962 | 0.911 | 1.016 | 1.66E-01 | NotReplicated |               |
|                            | rs12889665 | 14         | 75234830  | T         | 0.989 | 0.957 | 1.022 | 5.08E-01 | NotReplicated |               |
|                            | rs61997596 | 14         | 104511206 | A         | 1.043 | 1.001 | 1.087 | 4.57E-02 | NotReplicated |               |
|                            | rs11646401 | 16         | 21609978  | G         | 1.047 | 1.014 | 1.082 | 5.11E-03 | NotReplicated |               |
|                            | rs12967855 | 18         | 35138245  | A         | 1.008 | 0.974 | 1.044 | 6.49E-01 | NotReplicated |               |
| <b>Other<br/>Condition</b> |            |            |           |           |       |       |       |          |               |               |
|                            |            | rs6699744  | 1         | 72825144  | A     | 0.978 | 0.956 | 1.000    | 4.34E-02      | NotReplicated |
|                            |            | rs6697602  | 1         | 177039372 | G     | 0.993 | 0.955 | 1.030    | 7.06E-01      | NotReplicated |
|                            |            | rs11123030 | 2         | 124976163 | T     | 1.026 | 1.006 | 1.047    | 1.36E-02      | NotReplicated |
|                            |            | rs66511648 | 3         | 117515519 | C     | 0.997 | 0.973 | 1.021    | 8.26E-01      | NotReplicated |
|                            |            | rs30266    | 5         | 103972357 | A     | 1.023 | 1.000 | 1.045    | 5.02E-02      | NotReplicated |
|                            |            | rs12205083 | 6         | 24275483  | G     | 0.985 | 0.952 | 1.019    | 3.92E-01      | NotReplicated |
|                            |            | rs75782365 | 6         | 26408551  | G     | 0.754 | 0.714 | 0.794    | 8.89E-27      | Replicated    |
|                            |            | rs7772160  | 6         | 27412386  | C     | 0.981 | 0.960 | 1.001    | 6.87E-02      | NotReplicated |
|                            |            | rs4713145  | 6         | 28106827  | C     | 0.923 | 0.898 | 0.948    | 8.73E-09      | Replicated    |
|                            | rs3135296  | NA         | NA        | T         | NA    | NA    | NA    | NA       | NotReplicated |               |
|                            | rs3129120  | NA         | NA        | C         | NA    | NA    | NA    | NA       | NotReplicated |               |

|                            |                |            |    |           |   |       |       |       |          |               |
|----------------------------|----------------|------------|----|-----------|---|-------|-------|-------|----------|---------------|
|                            |                | rs3115631  | NA | NA        | A | NA    | NA    | NA    | NA       | NotReplicated |
|                            |                | rs2517622  | NA | NA        | C | NA    | NA    | NA    | NA       | NotReplicated |
|                            |                | rs1625792  | NA | NA        | A | NA    | NA    | NA    | NA       | NotReplicated |
|                            |                | rs535777   | 6  | 32577633  | C | 0.874 | 0.839 | 0.910 | 1.78E-13 | Replicated    |
|                            |                | rs236346   | 6  | 36832103  | C | 0.999 | 0.965 | 1.034 | 9.72E-01 | NotReplicated |
|                            |                | rs9345737  | 6  | 66676938  | G | 0.976 | 0.955 | 0.997 | 2.84E-02 | NotReplicated |
|                            |                | rs3807866  | 7  | 12250378  | A | 1.016 | 0.995 | 1.037 | 1.36E-01 | NotReplicated |
|                            |                | rs393488   | 9  | 17044971  | A | 0.982 | 0.961 | 1.003 | 9.64E-02 | NotReplicated |
|                            |                | rs12057031 | 9  | 25235063  | T | 0.954 | 0.920 | 0.989 | 7.57E-03 | NotReplicated |
|                            |                | rs11599236 | 10 | 106454672 | C | 0.961 | 0.939 | 0.982 | 3.63E-04 | Replicated    |
|                            |                | rs537635   | 11 | 88705235  | T | 1.014 | 0.993 | 1.035 | 1.97E-01 | NotReplicated |
|                            |                | rs578174   | 11 | 89959637  | G | 0.989 | 0.951 | 1.027 | 5.83E-01 | NotReplicated |
|                            |                | rs12889665 | 14 | 75234830  | T | 0.981 | 0.960 | 1.002 | 7.26E-02 | NotReplicated |
|                            |                | rs61997596 | 14 | 104511206 | A | 1.057 | 1.030 | 1.085 | 7.48E-05 | Replicated    |
|                            |                | rs11646401 | 16 | 21609978  | G | 1.026 | 1.004 | 1.048 | 1.66E-02 | NotReplicated |
|                            |                | rs12967855 | 18 | 35138245  | A | 1.015 | 0.993 | 1.037 | 1.77E-01 | NotReplicated |
| <b>Other<br/>Condition</b> | <b>Smoking</b> | rs6699744  | 1  | 72825144  | A | 0.996 | 0.986 | 1.006 | 4.22E-01 | NotReplicated |
|                            |                | rs6697602  | 1  | 177039372 | G | 1.001 | 0.984 | 1.019 | 8.82E-01 | NotReplicated |
|                            |                | rs11123030 | 2  | 124976163 | T | 0.998 | 0.988 | 1.008 | 6.74E-01 | NotReplicated |
|                            |                | rs66511648 | 3  | 117515519 | C | 1.000 | 0.990 | 1.012 | 9.33E-01 | NotReplicated |
|                            |                | rs30266    | 5  | 103972357 | A | 1.020 | 1.009 | 1.031 | 2.01E-04 | Replicated    |
|                            |                | rs12205083 | 6  | 24275483  | G | 1.005 | 0.989 | 1.021 | 5.48E-01 | NotReplicated |
|                            |                | rs75782365 | 6  | 26408551  | G | 0.967 | 0.952 | 0.982 | 2.55E-05 | Replicated    |
|                            |                | rs7772160  | 6  | 27412386  | C | 0.982 | 0.973 | 0.992 | 3.08E-04 | Replicated    |
|                            |                | rs4713145  | 6  | 28106827  | C | 0.978 | 0.967 | 0.989 | 1.53E-04 | Replicated    |
|                            |                | rs3135296  | 6  | 28795856  | T | 0.970 | 0.955 | 0.984 | 5.95E-05 | Replicated    |
|                            |                | rs3129120  | 6  | 29111775  | C | 0.970 | 0.956 | 0.985 | 6.00E-05 | Replicated    |
|                            |                | rs3115631  | 6  | 29986324  | A | 0.979 | 0.964 | 0.993 | 4.67E-03 | NotReplicated |
|                            |                | rs2517622  | 6  | 30155149  | C | 0.976 | 0.962 | 0.990 | 6.61E-04 | Replicated    |
|                            |                | rs1625792  | 6  | 31306420  | A | 0.979 | 0.966 | 0.993 | 3.04E-03 | NotReplicated |
|                            |                | rs535777   | 6  | 32577633  | C | 0.981 | 0.967 | 0.995 | 9.58E-03 | NotReplicated |

|                            |                    |            |    |           |       |       |          |            |          |               |
|----------------------------|--------------------|------------|----|-----------|-------|-------|----------|------------|----------|---------------|
|                            |                    | rs236346   | 6  | 36832103  | C     | 0.992 | 0.976    | 1.009      | 3.73E-01 | NotReplicated |
|                            |                    | rs9345737  | 6  | 66676938  | G     | 0.994 | 0.984    | 1.004      | 2.07E-01 | NotReplicated |
|                            |                    | rs3807866  | 7  | 12250378  | A     | 1.004 | 0.995    | 1.015      | 3.78E-01 | NotReplicated |
|                            |                    | rs393488   | 9  | 17044971  | A     | 0.997 | 0.987    | 1.007      | 5.18E-01 | NotReplicated |
|                            |                    | rs12057031 | 9  | 25235063  | T     | 0.982 | 0.966    | 0.998      | 2.29E-02 | NotReplicated |
|                            |                    | rs11599236 | 10 | 106454672 | C     | 0.988 | 0.978    | 0.998      | 1.79E-02 | NotReplicated |
|                            |                    | rs537635   | 11 | 88705235  | T     | 1.009 | 0.999    | 1.019      | 7.48E-02 | NotReplicated |
|                            |                    | rs578174   | 11 | 89959637  | G     | 0.982 | 0.967    | 0.999      | 3.19E-02 | NotReplicated |
|                            |                    | rs12889665 | 14 | 75234830  | T     | 0.988 | 0.978    | 0.998      | 1.38E-02 | NotReplicated |
|                            |                    | rs61997596 | 14 | 104511206 | A     | 1.010 | 0.997    | 1.023      | 1.19E-01 | NotReplicated |
|                            |                    | rs11646401 | 16 | 21609978  | G     | 1.000 | 0.990    | 1.010      | 9.81E-01 | NotReplicated |
|                            |                    | rs12967855 | 18 | 35138245  | A     | 1.011 | 1.000    | 1.022      | 4.10E-02 | NotReplicated |
| <b>Other<br/>Condition</b> | <b>Neuroticism</b> | rs6699744  | 1  | 72825144  | A     | 0.996 | 0.993    | 1.000      | 5.50E-02 | NotReplicated |
|                            |                    | rs6697602  | 1  | 177039372 | G     | 1.006 | 1.002    | 1.010      | 2.75E-03 | NotReplicated |
|                            |                    | rs11123030 | 2  | 124976163 | T     | 1.006 | 1.002    | 1.010      | 2.23E-03 | NotReplicated |
|                            |                    | rs66511648 | 3  | 117515519 | C     | 1.005 | 1.001    | 1.009      | 1.33E-02 | NotReplicated |
|                            |                    | rs30266    | 5  | 103972357 | A     | 1.009 | 1.005    | 1.013      | 3.75E-06 | Replicated    |
|                            |                    | rs12205083 | 6  | 24275483  | G     | 1.008 | 1.004    | 1.012      | 3.17E-05 | Replicated    |
|                            |                    | rs75782365 | 6  | 26408551  | G     | 0.992 | 0.988    | 0.996      | 3.35E-05 | Replicated    |
|                            |                    | rs7772160  | 6  | 27412386  | C     | 0.989 | 0.986    | 0.993      | 2.72E-08 | Replicated    |
|                            |                    | rs4713145  | 6  | 28106827  | C     | 0.993 | 0.989    | 0.996      | 9.14E-05 | Replicated    |
|                            |                    | rs3135296  | 6  | 28795856  | T     | 0.991 | 0.988    | 0.995      | 6.03E-06 | Replicated    |
|                            |                    | rs3129120  | 6  | 29111775  | C     | 0.992 | 0.988    | 0.995      | 1.53E-05 | Replicated    |
|                            |                    | rs3115631  | 6  | 29986324  | A     | 0.992 | 0.988    | 0.996      | 3.67E-05 | Replicated    |
|                            |                    | rs2517622  | 6  | 30155149  | C     | 0.993 | 0.989    | 0.997      | 2.15E-04 | Replicated    |
|                            |                    | rs1625792  | 6  | 31306420  | A     | 0.994 | 0.990    | 0.997      | 7.07E-04 | Replicated    |
|                            |                    | rs535777   | 6  | 32577633  | C     | 0.992 | 0.988    | 0.996      | 4.71E-05 | Replicated    |
|                            |                    | rs236346   | 6  | 36832103  | C     | 0.995 | 0.991    | 0.999      | 8.75E-03 | NotReplicated |
|                            |                    | rs9345737  | 6  | 66676938  | G     | 0.997 | 0.993    | 1.001      | 9.08E-02 | NotReplicated |
|                            |                    | rs3807866  | 7  | 12250378  | A     | 1.012 | 1.008    | 1.016      | 9.08E-10 | Replicated    |
| rs393488                   | 9                  | 17044971   | A  | 0.994     | 0.990 | 0.998 | 1.25E-03 | Replicated |          |               |

|            |    |           |   |       |       |       |          |               |
|------------|----|-----------|---|-------|-------|-------|----------|---------------|
| rs12057031 | 9  | 25235063  | T | 0.995 | 0.991 | 0.999 | 6.92E-03 | NotReplicated |
| rs11599236 | 10 | 106454672 | C | 0.989 | 0.986 | 0.993 | 5.16E-08 | Replicated    |
| rs537635   | 11 | 88705235  | T | 1.011 | 1.007 | 1.015 | 1.74E-08 | Replicated    |
| rs578174   | 11 | 89959637  | G | 0.994 | 0.990 | 0.997 | 7.41E-04 | Replicated    |
| rs12889665 | 14 | 75234830  | T | 0.987 | 0.983 | 0.991 | 9.88E-12 | Replicated    |
| rs61997596 | 14 | 104511206 | A | 1.005 | 1.001 | 1.009 | 1.29E-02 | NotReplicated |
| rs11646401 | 16 | 21609978  | G | 1.003 | 0.999 | 1.007 | 1.38E-01 | NotReplicated |
| rs12967855 | 18 | 35138245  | A | 1.015 | 1.012 | 1.019 | 1.47E-15 | Replicated    |

**Supplemental Table S14: Effects of GWAS loci from help-seeking definitions on other definitions of MDD in UKBiobank and psychiatric conditions**

This table shows the genome-wide significant loci (top SNP in 1MB regions) in GWAS minimal phenotyping, help-seeking definitions GPpsy and Psypsy and their effects in the following phenotypes: help-seeking definition GPpsy, DSM-based definition LifetimeMDD, help-seeking no-MDD definition that specifically exclude MDD symptoms GPNoDep, and other psychiatric conditions SCZ, neuroticism and smoking. For each SNP we show the chromosome (CHR), rsid (SNP), position on the chromosome (BP), and test and minor allele (A1). For each SNP-phenotype association we show the odds ratio (OR, in the case of neuroticism which is a quantitative trait, we show  $\exp(\text{BETA})$  as OR), the lower and upper bounds of the 95% confidence interval of OR (L95 and U95), and the p value of association (P). An association is considered ‘‘Replicated’’ if its p value is below  $3.09 \times 10^{-4}$  ( $p < 0.05$  after multiple testing correction for 162 tests in total) and its direction of effect is the same as that in the GPpsy and Psypsy, where the association is discovered.

| CATEGORY            | PHENOTYPE          | SNP        | CHR | BP        | A1    | OR    | L95      | U95           | P        | REPLICATION   |
|---------------------|--------------------|------------|-----|-----------|-------|-------|----------|---------------|----------|---------------|
| <b>Help seeking</b> | <b>GPpsy</b>       | rs301806   | 1   | 8482078   | C     | 1.021 | 1.010    | 1.031         | 1.00E-04 | Replicated    |
|                     |                    | rs11209948 | 1   | 72811904  | G     | 0.963 | 0.953    | 0.973         | 1.62E-12 | Replicated    |
|                     |                    | rs2422321  | 1   | 73293393  | G     | 1.021 | 1.010    | 1.032         | 8.96E-05 | Replicated    |
|                     |                    | rs12065553 | 1   | 80793118  | G     | 1.014 | 1.003    | 1.025         | 1.58E-02 | NotReplicated |
|                     |                    | rs1518395  | 2   | 58208074  | A     | 0.989 | 0.978    | 0.999         | 3.21E-02 | NotReplicated |
|                     |                    | rs1656369  | 3   | 158280085 | A     | 0.979 | 0.969    | 0.990         | 1.23E-04 | Replicated    |
|                     |                    | rs10514299 | 5   | 87663610  | T     | 1.017 | 1.005    | 1.029         | 4.77E-03 | NotReplicated |
|                     |                    | rs454214   | 5   | 88003403  | C     | 1.018 | 1.008    | 1.029         | 6.71E-04 | Replicated    |
|                     |                    | rs4543289  | 5   | 164484948 | T     | 0.977 | 0.967    | 0.987         | 6.52E-06 | Replicated    |
|                     |                    | rs1475120  | 6   | 105389953 | G     | 0.981 | 0.971    | 0.991         | 2.71E-04 | Replicated    |
|                     |                    | rs7044150  | 9   | 2982931   | T     | 0.987 | 0.977    | 0.998         | 1.90E-02 | NotReplicated |
|                     |                    | rs6476606  | 9   | 37005561  | A     | 1.023 | 1.012    | 1.034         | 2.54E-05 | Replicated    |
|                     |                    | rs10786831 | 10  | 106614571 | A     | 1.026 | 1.015    | 1.036         | 1.51E-06 | Replicated    |
|                     |                    | rs2125716  | 12  | 84941429  | A     | 1.018 | 1.006    | 1.030         | 4.03E-03 | NotReplicated |
|                     |                    | rs12552    | 13  | 53625781  | A     | 1.011 | 1.001    | 1.022         | 3.25E-02 | NotReplicated |
| rs8025231           | 15                 | 37648402   | C   | 1.018     | 1.008 | 1.029 | 5.68E-04 | Replicated    |          |               |
| rs2179744           | 22                 | 41621714   | A   | 1.015     | 1.004 | 1.027 | 7.78E-03 | NotReplicated |          |               |
| <b>DSM based</b>    | <b>LifetimeMDD</b> | rs301806   | 1   | 8482078   | C     | 0.998 | 0.973    | 1.023         | 8.44E-01 | NotReplicated |
|                     |                    | rs11209948 | 1   | 72811904  | G     | 0.977 | 0.952    | 1.002         | 6.88E-02 | NotReplicated |
|                     |                    | rs2422321  | 1   | 73293393  | G     | 1.038 | 1.012    | 1.065         | 4.52E-03 | NotReplicated |
|                     |                    | rs12065553 | 1   | 80793118  | G     | 1.032 | 1.004    | 1.060         | 2.37E-02 | NotReplicated |
|                     |                    | rs1518395  | 2   | 58208074  | A     | 0.990 | 0.965    | 1.016         | 4.63E-01 | NotReplicated |
|                     |                    | rs1656369  | 3   | 158280085 | A     | 0.978 | 0.952    | 1.004         | 8.95E-02 | NotReplicated |
|                     |                    | rs10514299 | 5   | 87663610  | T     | 1.008 | 0.979    | 1.037         | 6.03E-01 | NotReplicated |
|                     |                    | rs454214   | 5   | 88003403  | C     | 1.029 | 1.003    | 1.056         | 2.77E-02 | NotReplicated |
|                     |                    | rs4543289  | 5   | 164484948 | T     | 0.949 | 0.926    | 0.974         | 5.19E-05 | Replicated    |
|                     |                    | rs1475120  | 6   | 105389953 | G     | 0.987 | 0.962    | 1.012         | 2.92E-01 | NotReplicated |
|                     |                    | rs7044150  | 9   | 2982931   | T     | 1.006 | 0.980    | 1.032         | 6.77E-01 | NotReplicated |
|                     |                    | rs6476606  | 9   | 37005561  | A     | 1.021 | 0.995    | 1.048         | 1.22E-01 | NotReplicated |
|                     |                    | rs10786831 | 10  | 106614571 | A     | 1.024 | 0.999    | 1.051         | 6.34E-02 | NotReplicated |

|                        |                |            |    |           |       |       |          |               |          |               |
|------------------------|----------------|------------|----|-----------|-------|-------|----------|---------------|----------|---------------|
|                        |                | rs2125716  | 12 | 84941429  | A     | 1.013 | 0.983    | 1.044         | 3.97E-01 | NotReplicated |
|                        |                | rs12552    | 13 | 53625781  | A     | 1.042 | 1.016    | 1.068         | 1.62E-03 | Replicated    |
|                        |                | rs8025231  | 15 | 37648402  | C     | 1.027 | 1.002    | 1.053         | 3.58E-02 | NotReplicated |
|                        |                | rs2179744  | 22 | 41621714  | A     | 1.044 | 1.015    | 1.073         | 2.47E-03 | Replicated    |
| <b>No-MDD</b>          | <b>GPN0Dep</b> | rs301806   | 1  | 8482078   | C     | 0.985 | 0.953    | 1.018         | 3.64E-01 | NotReplicated |
|                        |                | rs11209948 | 1  | 72811904  | G     | 0.984 | 0.952    | 1.017         | 3.32E-01 | NotReplicated |
|                        |                | rs2422321  | 1  | 73293393  | G     | 1.014 | 0.981    | 1.048         | 4.16E-01 | NotReplicated |
|                        |                | rs12065553 | 1  | 80793118  | G     | 0.980 | 0.946    | 1.015         | 2.65E-01 | NotReplicated |
|                        |                | rs1518395  | 2  | 58208074  | A     | 0.999 | 0.966    | 1.032         | 9.38E-01 | NotReplicated |
|                        |                | rs1656369  | 3  | 158280085 | A     | 0.984 | 0.951    | 1.018         | 3.61E-01 | NotReplicated |
|                        |                | rs10514299 | 5  | 87663610  | T     | 1.040 | 1.002    | 1.079         | 4.05E-02 | NotReplicated |
|                        |                | rs454214   | 5  | 88003403  | C     | 1.020 | 0.986    | 1.054         | 2.49E-01 | NotReplicated |
|                        |                | rs4543289  | 5  | 164484948 | T     | 0.958 | 0.928    | 0.990         | 9.89E-03 | NotReplicated |
|                        |                | rs1475120  | 6  | 105389953 | G     | 1.022 | 0.989    | 1.056         | 1.89E-01 | NotReplicated |
|                        |                | rs7044150  | 9  | 2982931   | T     | 1.005 | 0.972    | 1.040         | 7.61E-01 | NotReplicated |
|                        |                | rs6476606  | 9  | 37005561  | A     | 0.999 | 0.966    | 1.034         | 9.65E-01 | NotReplicated |
|                        |                | rs10786831 | 10 | 106614571 | A     | 1.050 | 1.016    | 1.085         | 4.02E-03 | NotReplicated |
|                        |                | rs2125716  | 12 | 84941429  | A     | 1.045 | 1.005    | 1.086         | 2.57E-02 | NotReplicated |
|                        |                | rs12552    | 13 | 53625781  | A     | 1.006 | 0.974    | 1.040         | 7.20E-01 | NotReplicated |
| rs8025231              | 15             | 37648402   | C  | 1.023     | 0.990 | 1.057 | 1.74E-01 | NotReplicated |          |               |
| rs2179744              | 22             | 41621714   | A  | 1.012     | 0.976 | 1.049 | 5.18E-01 | NotReplicated |          |               |
| <b>Other condition</b> | <b>SCZ</b>     | rs301806   | 1  | 8482078   | C     | 0.946 | 0.925    | 0.967         | 1.38E-06 | NotReplicated |
|                        |                | rs11209948 | 1  | 72811904  | G     | 0.980 | 0.958    | 1.002         | 7.77E-02 | NotReplicated |
|                        |                | rs2422321  | 1  | 73293393  | G     | 1.059 | 1.037    | 1.080         | 2.18E-08 | Replicated    |
|                        |                | rs12065553 | 1  | 80793118  | G     | 1.016 | 0.993    | 1.039         | 1.77E-01 | NotReplicated |
|                        |                | rs1518395  | 2  | 58208074  | A     | 0.942 | 0.921    | 0.963         | 3.43E-08 | Replicated    |
|                        |                | rs1656369  | 3  | 158280085 | A     | 1.000 | 0.977    | 1.022         | 9.72E-01 | NotReplicated |
|                        |                | rs10514299 | 5  | 87663610  | T     | 0.964 | 0.940    | 0.988         | 2.75E-03 | NotReplicated |
|                        |                | rs454214   | 5  | 88003403  | C     | 0.973 | 0.952    | 0.993         | 1.09E-02 | NotReplicated |
|                        |                | rs4543289  | 5  | 164484948 | T     | 0.995 | 0.974    | 1.016         | 6.67E-01 | NotReplicated |
|                        |                | rs1475120  | 6  | 105389953 | G     | 1.049 | 1.029    | 1.070         | 1.87E-06 | NotReplicated |



|                        |                    |            |    |           |       |       |          |               |          |               |
|------------------------|--------------------|------------|----|-----------|-------|-------|----------|---------------|----------|---------------|
|                        |                    | rs7044150  | 9  | 2982931   | T     | 0.985 | 0.963    | 1.007         | 1.74E-01 | NotReplicated |
|                        |                    | rs6476606  | 9  | 37005561  | A     | 0.978 | 0.956    | 0.999         | 4.24E-02 | NotReplicated |
|                        |                    | rs10786831 | 10 | 106614571 | A     | 1.047 | 1.025    | 1.068         | 2.34E-05 | Replicated    |
|                        |                    | rs2125716  | 12 | 84941429  | A     | 0.991 | 0.965    | 1.016         | 4.72E-01 | NotReplicated |
|                        |                    | rs12552    | 13 | 53625781  | A     | 0.993 | 0.972    | 1.014         | 5.22E-01 | NotReplicated |
|                        |                    | rs8025231  | 15 | 37648402  | C     | 1.003 | 0.982    | 1.024         | 7.63E-01 | NotReplicated |
|                        |                    | rs2179744  | 22 | 41621714  | A     | 1.064 | 1.041    | 1.087         | 8.31E-08 | Replicated    |
| <b>Other condition</b> | <b>Smoking</b>     | rs301806   | 1  | 8482078   | C     | 0.989 | 0.979    | 0.999         | 2.59E-02 | NotReplicated |
|                        |                    | rs11209948 | 1  | 72811904  | G     | 0.994 | 0.984    | 1.004         | 2.47E-01 | NotReplicated |
|                        |                    | rs2422321  | 1  | 73293393  | G     | 1.012 | 1.001    | 1.022         | 2.44E-02 | NotReplicated |
|                        |                    | rs12065553 | 1  | 80793118  | G     | 1.024 | 1.013    | 1.035         | 1.99E-05 | Replicated    |
|                        |                    | rs1518395  | 2  | 58208074  | A     | 0.989 | 0.979    | 0.999         | 2.85E-02 | NotReplicated |
|                        |                    | rs1656369  | 3  | 158280085 | A     | 0.981 | 0.971    | 0.991         | 3.07E-04 | Replicated    |
|                        |                    | rs10514299 | 5  | 87663610  | T     | 0.974 | 0.963    | 0.985         | 3.95E-06 | NotReplicated |
|                        |                    | rs454214   | 5  | 88003403  | C     | 0.995 | 0.985    | 1.005         | 3.06E-01 | NotReplicated |
|                        |                    | rs4543289  | 5  | 164484948 | T     | 0.990 | 0.980    | 0.999         | 3.74E-02 | NotReplicated |
|                        |                    | rs1475120  | 6  | 105389953 | G     | 0.999 | 0.989    | 1.008         | 7.76E-01 | NotReplicated |
|                        |                    | rs7044150  | 9  | 2982931   | T     | 0.994 | 0.984    | 1.004         | 2.49E-01 | NotReplicated |
|                        |                    | rs6476606  | 9  | 37005561  | A     | 0.995 | 0.985    | 1.005         | 3.16E-01 | NotReplicated |
|                        |                    | rs10786831 | 10 | 106614571 | A     | 1.006 | 0.996    | 1.016         | 2.40E-01 | NotReplicated |
|                        |                    | rs2125716  | 12 | 84941429  | A     | 1.019 | 1.007    | 1.031         | 1.93E-03 | Replicated    |
|                        |                    | rs12552    | 13 | 53625781  | A     | 1.018 | 1.008    | 1.028         | 5.80E-04 | Replicated    |
| rs8025231              | 15                 | 37648402   | C  | 1.004     | 0.995 | 1.014 | 3.78E-01 | NotReplicated |          |               |
| rs2179744              | 22                 | 41621714   | A  | 1.000     | 0.990 | 1.011 | 9.40E-01 | NotReplicated |          |               |
| <b>Other condition</b> | <b>Neuroticism</b> | rs301806   | 1  | 8482078   | C     | 1.009 | 1.005    | 1.013         | 4.26E-06 | Replicated    |
|                        |                    | rs11209948 | 1  | 72811904  | G     | 0.997 | 0.994    | 1.001         | 1.56E-01 | NotReplicated |
|                        |                    | rs2422321  | 1  | 73293393  | G     | 1.003 | 0.999    | 1.007         | 1.37E-01 | NotReplicated |
|                        |                    | rs12065553 | 1  | 80793118  | G     | 1.005 | 1.002    | 1.009         | 5.13E-03 | NotReplicated |
|                        |                    | rs1518395  | 2  | 58208074  | A     | 0.991 | 0.987    | 0.995         | 1.38E-06 | Replicated    |
|                        |                    | rs1656369  | 3  | 158280085 | A     | 0.995 | 0.991    | 0.999         | 6.42E-03 | NotReplicated |
|                        |                    | rs10514299 | 5  | 87663610  | T     | 1.005 | 1.001    | 1.009         | 7.18E-03 | NotReplicated |

|            |    |           |   |       |       |       |          |               |
|------------|----|-----------|---|-------|-------|-------|----------|---------------|
| rs454214   | 5  | 88003403  | C | 1.004 | 1.001 | 1.008 | 2.09E-02 | NotReplicated |
| rs4543289  | 5  | 164484948 | T | 0.992 | 0.988 | 0.995 | 8.95E-06 | Replicated    |
| rs1475120  | 6  | 105389953 | G | 0.994 | 0.990 | 0.997 | 7.84E-04 | Replicated    |
| rs7044150  | 9  | 2982931   | T | 0.995 | 0.991 | 0.999 | 6.36E-03 | NotReplicated |
| rs6476606  | 9  | 37005561  | A | 1.005 | 1.001 | 1.009 | 6.82E-03 | NotReplicated |
| rs10786831 | 10 | 106614571 | A | 1.007 | 1.003 | 1.011 | 4.39E-04 | Replicated    |
| rs2125716  | 12 | 84941429  | A | 1.002 | 0.999 | 1.006 | 2.30E-01 | NotReplicated |
| rs12552    | 13 | 53625781  | A | 1.002 | 0.999 | 1.006 | 2.25E-01 | NotReplicated |
| rs8025231  | 15 | 37648402  | C | 1.003 | 0.999 | 1.006 | 1.67E-01 | NotReplicated |
| rs2179744  | 22 | 41621714  | A | 1.011 | 1.007 | 1.015 | 2.24E-08 | Replicated    |

**Supplemental Table S15: Effects of GWAS loci from minimal phenotyping definition of MDD in 23andMe on definitions of MDD in UKBiobank and psychiatric conditions**

This table shows the genome-wide significant loci (top SNP in 1MB regions) in GWAS minimal phenotyping definitions of MDD in 23andMe and their effects in the following phenotypes: help-seeking definition GPpsy, DSM-based definition LifetimeMDD, help-seeking no-MDD definition that specifically exclude MDD symptoms GPNoDep, and other psychiatric conditions SCZ, neuroticism and smoking. For each SNP we show the chromosome (CHR), rsid (SNP), position on the chromosome (BP), and test and minor allele (A1). For each SNP-phenotype association we show the odds ratio (OR, in the case of neuroticism which is a quantitative trait, we show  $\exp(\text{BETA})$  as OR), the lower and upper bounds of the 95% confidence interval of OR (L95 and U95), and the p value of association (P). An association is considered “Replicated” if its p value is below  $4.90 \times 10^{-4}$  ( $p < 0.05$  after multiple testing correction for 102 tests in total) and its direction of effect is the same as that in 23andMe, where the association is discovered.

## Supplemental References

- 1 Bycroft, C. *et al.* Genome-wide genetic data on ~500,000 UK Biobank participants. *bioRxiv* (2017).
- 2 Wain, L. V. *et al.* Novel insights into the genetics of smoking behaviour, lung function, and chronic obstructive pulmonary disease (UK BiLEVE): a genetic association study in UK Biobank. *The Lancet Respiratory Medicine* **3**, 769-781, doi:10.1016/S2213-2600(15)00283-0 (2015).
- 3 Association, A. P. *Diagnostic and statistical manual of mental disorders (5th ed.)*. (American Psychiatric Association, 2003).
- 4 Office for National Statistics, N. R. o. S., Northern Ireland Statistics and Research Agency (2016). 2011 Census aggregate data. UK Data Service (Edition: June 2016). (2011).
- 5 Price, A. L. *et al.* Long-Range LD Can Confound Genome Scans in Admixed Populations. *The American Journal of Human Genetics* **83**, 132-135, doi:10.1016/j.ajhg.2008.06.005 (2008).
- 6 Golan, D., Lander, E. S. & Rosset, S. Measuring missing heritability: inferring the contribution of common variants. *Proc Natl Acad Sci U S A* **111**, E5272-5281, doi:10.1073/pnas.1419064111 (2014).
- 7 Loh, P.-R. *et al.* Contrasting genetic architectures of schizophrenia and other complex diseases using fast variance-components analysis. *Nature Genetics* **47**, 1385-1392, doi:10.1038/ng.3431 (2015).
- 8 Speed, D., Hemani, G., Johnson, M. R. & Balding, D. J. Improved heritability estimation from genome-wide SNPs. *Am J Hum Genet* **91**, 1011-1021, doi:10.1016/j.ajhg.2012.10.010 (2012).
- 9 Yang, J., Lee, S. H., Goddard, M. E. & Visscher, P. M. GCTA: a tool for genome-wide complex trait analysis. *Am J Hum Genet* **88**, 76-82, doi:10.1016/j.ajhg.2010.11.011 (2011).
- 10 Bulik-Sullivan, B. K. *et al.* LD Score regression distinguishes confounding from polygenicity in genome-wide association studies. *Nature Genetics*, doi:10.1038/ng.3211 (2015).
- 11 Shi, H., Kichaev, G. & Pasaniuc, B. Contrasting the Genetic Architecture of 30 Complex Traits from Summary Association Data. *American Journal of Human Genetics*, doi:10.1016/j.ajhg.2016.05.013 (2016).
- 12 Weissbrod, O., Flint, J. & Rosset, S. Estimating SNP-Based Heritability and Genetic Correlation in Case-Control Studies Directly and with Summary Statistics. *The American Journal of Human Genetics* **103**, 89-99, doi:10.1016/j.ajhg.2018.06.002 (2018).
- 13 Evans, L. M. *et al.* Comparison of methods that use whole genome data to estimate the heritability and genetic architecture of complex traits. *Nat Genet* **50**, 737-745, doi:10.1038/s41588-018-0108-x (2018).
- 14 Speed, D. *et al.* Reevaluation of SNP heritability in complex human traits. *Nat Genet* **49**, 986-992, doi:10.1038/ng.3865 (2017).
- 15 consortium, C. Sparse whole-genome sequencing identifies two loci for major depressive disorder. *Nature*, doi:10.1038/nature14659 (2015).

- 16 Howard, D. M. *et al.* Genome-wide association study of depression phenotypes in UK Biobank identifies variants in excitatory synaptic pathways. *Nature Communications* **9**, 1470, doi:10.1038/s41467-018-03819-3 (2018).
- 17 Hyde, C. L. *et al.* Identification of 15 genetic loci associated with risk of major depression in individuals of European descent. *Nature Genetics* **48**, 1031-1036, doi:10.1038/ng.3623 (2016).
- 18 Major Depressive Disorder Working Group of the Psychiatric, G. C. *et al.* A mega-analysis of genome-wide association studies for major depressive disorder. *Mol Psychiatry* **18**, 497-511, doi:10.1038/mp.2012.21 (2013).
- 19 Peterson, R. E. *et al.* Molecular genetic analysis subdivided by adversity exposure suggests etiologic heterogeneity in major depression. *American Journal of Psychiatry*, doi:10.1176/appi.ajp.2017.17060621 (2018).
- 20 Dahl, A., Cai, N., Flint, J. & Zaitlen, N. GxEMM: Extending linear mixed models to general gene-environment interactions. *bioRxiv* (2018).
- 21 Dempster, E. R. & Lerner, I. M. Heritability of Threshold Characters. *Genetics* **35**, 212-236 (1950).
- 22 Speed, D. & Balding, D. Better estimation of SNP heritability from summary statistics provides a new understanding of the genetic architecture of complex traits. *bioRxiv* (2018).
- 23 Chang, C. C. *et al.* Second-generation PLINK: rising to the challenge of larger and richer datasets. *GigaScience* **4**, 7, doi:10.1186/s13742-015-0047-8 (2015).
- 24 Schizophrenia Working Group of the Psychiatric Genomics, C. Biological insights from 108 schizophrenia-associated genetic loci. *Nature* **511**, 421-427, doi:10.1038/nature13595 (2014).
- 25 Kessler, R. C. *et al.* The epidemiology of major depressive disorder: results from the National Comorbidity Survey Replication (NCS-R). *JAMA* **289**, 3095-3105, doi:10.1001/jama.289.23.3095 (2003).
- 26 Demontis, D. *et al.* Discovery Of The First Genome-Wide Significant Risk Loci For ADHD. *bioRxiv* (2017).
- 27 Psychiatric, G. C. B. D. W. G. Large-scale genome-wide association analysis of bipolar disorder identifies a new susceptibility locus near ODZ4. *Nat Genet* **43**, 977-983, doi:10.1038/ng.943 (2011).
- 28 Merikangas, K. R. *et al.* Prevalence and correlates of bipolar spectrum disorder in the world mental health survey initiative. *Arch Gen Psychiatry* **68**, 241-251, doi:10.1001/archgenpsychiatry.2011.12 (2011).
- 29 Cross-Disorder Group of the Psychiatric Genomics, C. Identification of risk loci with shared effects on five major psychiatric disorders: a genome-wide analysis. *Lancet* **381**, 1371-1379, doi:10.1016/S0140-6736(12)62129-1 (2013).
